1 **Title:** Mechanisms governing protective pregnancy-induced adaptations of the pelvic floor  
2 muscles in the rat pre-clinical model

3

4 **Authors:**

5 **Dr. Mary M. RIEGER M.D., M.A.S.** San Diego, California. Department of Obstetrics,  
6 Gynecology, and Reproductive Sciences, University of California, San Diego.

7 **Ms. Michelle WONG, B.S.** San Diego, California. Department of Obstetrics, Gynecology, and  
8 Reproductive Sciences, University of California, San Diego.

9 **Dr. Lindsey A. BURNETT Ph.D, M.D.** San Diego, California. Department of Obstetrics,  
10 Gynecology, and Reproductive Sciences, University of California, San Diego.

11 **Dr. Francesca BOSCOLO SESILLO Ph.D.** San Diego, California. Department of Obstetrics,  
12 Gynecology, and Reproductive Sciences, University of California, San Diego.

13 **Ms. Brittini B. BAYNES M.S.** San Diego, California. Department of Obstetrics, Gynecology,  
14 and Reproductive Sciences, University of California, San Diego.

15 **Dr. Marianna ALPERIN M.D., M.S.** San Diego, California. Department of Obstetrics,  
16 Gynecology, and Reproductive Sciences, Division of Female Pelvic Medicine and  
17 Reconstructive Surgery, University of California, San Diego.

18

19

20 **Conflicts of interest:** M.A. is a member of the Medical Advisory Board, Renovia, Inc. The  
21 remaining authors report no conflict of interest.

22

23 **Funding:** The authors gratefully acknowledge funding by NIH/NICHD R01 HD092515 for the  
24 conduct of this research.

25

26 **Presentation Information:** Portions of this work have been presented at American  
27 Urogynecologic Society/International Urogynecology Association Annual Scientific Meeting,  
28 Nashville, TN, September 24-29, 2019 and American Urogynecologic Society Annual Scientific  
29 Meeting, PFD Week, Virtual Meeting, October 8-10, 2020

30

31 **Corresponding Author:**

32 Marianna Alperin, MD, MS

33 University of California, San Diego

34 9500 Gilman Drive

35 La Jolla, CA 92093-0863

36 Phone: +1 858-534-5015

37 email: [malperin@health.ucsd.edu](mailto:malperin@health.ucsd.edu)

38

39 **Word count:**

40 Abstract: 500 words

41 Main text: 4259 words

42

43 **Condensation:** Mechanical load promotes pelvic floor muscle plasticity in the rat pre-clinical  
44 model, altering muscle physiologic limits and providing partial protection against birth injury.

45

46 **Short title:** Mechanisms governing pregnancy-induced adaptations of pelvic floor muscles

47

48 **AJOG at a Glance:**

49 A. Why was the study conducted?

- 50 • To determine the role of mechanical load, uncoupled from the hormonal milieu of  
51 pregnancy, in driving protective pregnancy-induced adaptations previously  
52 discovered in the rat pelvic floor muscles.

53 B. What are the key findings?

- 54 • Mechanical load, in the absence of pregnancy hormones, induces  
55 sarcomerogenesis and extracellular matrix remodeling in rat pelvic floor muscles.  
56 • Load-induced adaptations are partially protective against mechanical pelvic floor  
57 muscle injury consequent to parturition-associated strains.

58 C. What does this study add to what is already known?

- 59 • The effect of sustained increased mechanical load, uncoupled from the hormonal  
60 milieu of pregnancy, on pelvic floor muscle plasticity has not been previously  
61 studied.  
62 • Modulating pelvic floor muscles' stretch antepartum, such as with specialized  
63 pelvic floor physical therapy regimens, could be a promising approach for  
64 augmentation of protective muscle adaptations in women.

65

66 **ABSTRACT**

67 **Background:** The intrinsic properties of pelvic soft tissues in women who do and do not sustain  
68 birth injuries are likely divergent, however little is known about this. Rat pelvic floor muscles  
69 undergo protective pregnancy-induced structural adaptations, sarcomerogenesis and increase in  
70 intramuscular collagen content, that protect against birth injury.

71 **Objectives:** We aimed to test the following hypotheses: 1) increased mechanical load of gravid  
72 uterus drives antepartum adaptations; 2) load-induced changes are sufficient to protect pelvic  
73 muscles from birth injury.

74 **Study Design:** Independent effects of load uncoupled from hormonal milieu of pregnancy were  
75 tested in 3- to 4-month-old Sprague-Dawley rats randomly divided into four groups, N=5-  
76 10/group: (1) load<sup>-</sup>/pregnancy hormones<sup>-</sup> (controls); (2) load<sup>+</sup>/pregnancy hormones<sup>-</sup>; (3) reduced  
77 load/pregnancy hormones<sup>+</sup>; (4) load<sup>+</sup>/pregnancy hormones<sup>+</sup>. Mechanical load simulating a gravid  
78 uterus was simulated by weighing uterine horns with beads similar to fetal rat size and weight.  
79 Reduced load was achieved by unilateral pregnancy after unilateral uterine horn ligation. To  
80 assess acute and chronic phases required for sarcomerogenesis, rats were sacrificed at 4 hours or  
81 21 days post bead loading. Coccygeus, iliocaudalis, pubocaudalis and non-pelvic tibialis anterior  
82 were harvested for myofiber and sarcomere length measurements. Intramuscular collagen  
83 content was assessed using hydroxyproline assay. Additional 20 load<sup>+</sup>/pregnancy hormones<sup>-</sup> rats  
84 underwent vaginal distention to determine whether load-induced changes are sufficient to protect  
85 from mechanical muscle injury in response to parturition-associated strains of various  
86 magnitude. Data, compared using two-way repeated measures analysis of variance/pairwise  
87 comparisons, are presented as mean  $\pm$  standard error of mean.

88 **Results:** Acute increase in load resulted in significant pelvic floor muscle stretch, accompanied  
89 by acute increase in sarcomere length compared to non-loaded control muscles (coccygeus:  
90  $2.69\pm 0.03$  vs  $2.30\pm 0.06$   $\mu\text{m}$ ,  $P<0.001$ ; pubocaudalis:  $2.71\pm 0.04$  vs  $2.25\pm 0.03$   $\mu\text{m}$ ,  $P<0.0001$ ;  
91 iliocaudalis:  $2.80\pm 0.06$  vs  $2.35\pm 0.04$   $\mu\text{m}$ ,  $P<0.0001$ ). After 21 days of sustained load,  
92 sarcomeres returned to operational length in all pelvic muscles ( $P>0.05$ ). However, the  
93 myofibers remained significantly longer in load<sup>+</sup>/pregnancy hormones<sup>-</sup> compared to load<sup>-</sup>  
94 /pregnancy hormones<sup>-</sup> in coccygeus ( $13.33\pm 0.94$  vs  $9.97\pm 0.26$  mm,  $P<0.0001$ ) and pubocaudalis  
95 ( $21.20\pm 0.52$  vs  $19.52\pm 0.34$  mm,  $P<0.04$ ) and not different from load<sup>+</sup>/pregnancy hormones<sup>+</sup>  
96 ( $12.82\pm 0.30$  and  $22.53\pm 0.32$ mm, respectively,  $P>0.1$ ), indicating that sustained load induced  
97 sarcomerogenesis in these muscles. Intramuscular collagen content in load<sup>+</sup>/pregnancy  
98 hormones<sup>-</sup> group was significantly greater relative to controls in coccygeus ( $6.55\pm 0.85$  vs  
99  $3.11\pm 0.47\mu\text{g}/\text{mg}$ ,  $P<0.001$ ) and pubocaudalis ( $5.93\pm 0.79$  vs  $3.46\pm 0.52$   $\mu\text{g}/\text{mg}$ ,  $P<0.05$ ) and not  
100 different from load<sup>+</sup>/pregnancy hormones<sup>+</sup> ( $7.45\pm 0.65$  and  $6.05\pm 0.62$   $\mu\text{g}/\text{mg}$ , respectively,  
101  $P>0.5$ ). Iliocaudalis required both mechanical and endocrine cues for sarcomerogenesis. Tibialis  
102 anterior was not affected by mechanical or endocrine alterations. Despite equivalent extent of  
103 adaptations, load-induced changes were only partially protective against sarcomere  
104 hyperelongation.

105 **Conclusions:** Load induces plasticity of the intrinsic pelvic floor muscle components that  
106 renders protection against mechanical birth injury. The protective effect, which varies between  
107 individual muscles and strain magnitudes, is further augmented by the presence of pregnancy  
108 hormones. Maximizing impact of mechanical load on pelvic floor muscles during pregnancy,  
109 such as with specialized pelvic floor muscle stretching regimens, is a potentially actionable target

110 for augmenting pregnancy-induced adaptations to decrease birth injury in women who may  
111 otherwise have incomplete antepartum muscle adaptations.

112 **KEY WORDS:** sarcomerogenesis, pelvic floor muscles, birth injury, rat, pregnancy, adaptations

113

114 **INTRODUCTION**

115

116 Pelvic floor disorders (PFDs), including pelvic organ prolapse, urinary incontinence and  
117 fecal incontinence, are highly prevalent conditions that adversely impact the quality of life of  
118 women. Dysfunction of the pelvic floor muscles (PFMs), which include the three paired muscles  
119 – pubovisceralis and iliococcygeus that comprise levator ani, and coccygeus – and specifically  
120 levator ani has been implicated as one of the key risk factors in the pathogenesis of PFDs.<sup>1,2</sup>  
121 Vaginal childbirth is an inciting event for pelvic floor dysfunction in many women, in part  
122 because parturition results in elongation of the PFMs up to 300% of their resting muscle length.<sup>3</sup>  
123 These dramatic strains substantially exceed the 60% elongation that has been shown to result in  
124 reproducible injury in limb skeletal muscles.<sup>3-5</sup> Curiously, for reasons yet unknown, a large  
125 proportion of vaginally parous women do not develop pelvic floor dysfunction despite similar  
126 obstetrical variables to women who do have such dysfunction postpartum.<sup>6</sup>

127 PFMs are skeletal muscles composed of myofibers that are, in turn, made of muscle basic  
128 contractile units - sarcomeres. Skeletal muscles exhibit plasticity in response to alterations in  
129 physiological cues,<sup>7</sup> including the dynamic assembly of the sarcomere units, known as  
130 sarcomerogenesis. In the limb, when muscles are subjected to increased mechanical load, the  
131 sarcomeres acutely elongate in response to muscle stretch.<sup>8</sup> If the muscle stretch is sustained,  
132 sarcomeres are added in series to restore operational sarcomere length, resulting in increased  
133 fiber length and facilitating optimal *in vivo* muscle function.<sup>5,9,10</sup> Another important structural  
134 component of skeletal muscles is the intramuscular connective tissue network that surrounds the  
135 contractile myofibers. The intramuscular extracellular matrix (ECM), primarily composed of  
136 collagens, provides support to myofibers and bears the majority of muscle's passive load. Both *in*  
137 *vitro* and *in vivo* studies suggest that mechanical loading induces ECM remodeling in the limb

138 muscles via growth-factor-mediated cell-signaling pathways, presumably to ensure mechanical  
139 stability of the muscle fibers; however, this process is not well understood.<sup>11,12</sup>

140 Significant technical and ethical constraints preclude direct studies of the human PFMs,  
141 especially in pregnant women. Consequently, we utilize a validated rat model, as the rat PFM  
142 anatomy and architecture are well suited for the studies of the human PFMs.<sup>13,14</sup> In response to  
143 the physiological cues associated with pregnancy, the rat vagina and supportive tissues exhibit  
144 significant plasticity which facilitate the ability of the vagina to withstand parturition.<sup>15-17</sup> We  
145 have previously shown that the rat PFMs also undergo adaptations during pregnancy, specifically  
146 myofiber elongation via sarcomerogenesis.<sup>18</sup> This allows PFMs to maintain operational  
147 sarcomere length and preserves muscle force generation capacity necessary to support the  
148 increased load of the pregnant uterus. Additionally, sarcomerogenesis appears to protect against  
149 PFM injury during parturition because of increased ability to withstand muscle strain without  
150 pathological sarcomere hyperelongation and the associated myofibrillar disruption.<sup>19</sup> Pregnancy-  
151 induced alterations also take place in PFMs' ECM. We found that, in contrast to other pelvic  
152 tissues, intramuscular collagen content significantly increases in PFMs in pregnancy.<sup>20</sup> This  
153 increase in ECM collagen content is presumed to stabilize elongated PFM fibers and to further  
154 protect them from overstretching during parturition. However, the mechanisms leading to  
155 sarcomerogenesis and ECM remodeling during pregnancy remain unknown.

156 In the current study, using the rat pre-clinical model validated for the investigations of  
157 human PFMs<sup>13,14</sup>, we aimed to: 1a) determine the acute effect of increased mechanical load on  
158 PFMs; 1b) decipher the relative contributions of the chronic mechanical load and pregnancy  
159 hormonal milieu on the pregnancy-induced adaptations of PFMs; and 2) assess whether load-  
160 induced alterations modulate PFMs' response to parturition-associated strains. We hypothesized



161 that acute increase in mechanical load imposed on PFMs would result in muscle and sarcomere  
162 stretch. We opined that this acute change in sarcomere length ( $L_s$ ), combined with sustained  
163 increased load, would be sufficient to induce sarcomerogenesis and increased ECM collagen  
164 content in PFMs observed during pregnancy. Finally, we hypothesized that load-induced  
165 sarcomerogenesis and increased ECM collagen content are sufficient to protect PFMs from the  
166 intrapartum sarcomere hyperelongation, the major cause of mechanical muscle injury, in the  
167 absence of other physiologic changes of pregnancy.

168

## 169 **MATERIALS AND METHODS**

170 To delve into the potential mechanisms that govern protective PFM adaptations, we  
171 started by uncoupling the endocrine and mechanical effects of pregnancy on the muscle  
172 structural parameters. To segregate mechanical load from the hormonal cues, we exposed PFMs  
173 to the following *four sets of conditions*: 1) load<sup>-</sup>/pregnancy hormones<sup>-</sup> (non-pregnant control); 2)  
174 load<sup>+</sup>/pregnancy hormones<sup>-</sup> (non-pregnant loaded); 3) reduced load/pregnancy hormones<sup>+</sup>  
175 (unilateral pregnancy); and 4) load<sup>+</sup>/pregnancy hormones<sup>+</sup> (pregnant) (Figure 1). Group 3 was  
176 chosen as a model of reduced load/pregnancy hormones<sup>+</sup> because it is not possible to recapitulate  
177 the full array of complex hormonal alterations that occur in pregnancy without exposing PFMs to  
178 at least some increased load, as the hormonal milieu is naturally induced by the conceptuses  
179 themselves.

180 The University of California San Diego Institutional Animal Care and Use Committee  
181 (IACUC) approved all study procedures. Three- and 4-month-old Sprague-Dawley rats (Envigo,  
182 Indianapolis, IN) were used in the following series of experiments. Rats were housed 2-3/cage  
183 according to the IACUC standards and allowed ad lib access to food and water.

184 *Non-pregnant rat model of mechanical loading of the pelvic floor muscles*

185 To simulate the increased load imposed on PFMs during pregnancy without the  
186 concomitant effects of hormonal alterations, we developed a novel non-pregnant rat model with a  
187 weight-loaded uterine horns (Figure 1). Three-month-old nulligravid rats (N=10) were  
188 anesthetized with isoflurane and administered a pre-operative subcutaneous injection of  
189 buprenorphine sustained release at a dose of 1.0 mg/kg. The abdominal fur was removed with  
190 depilatory cream (Nair Hair Remover, Ewing, NJ), the skin was sterilized with 4% chlorhexidine  
191 gluconate solution (Hibiclens, Norcross, GA), and rats were sterilely draped. Midline laparotomy  
192 was performed using standard aseptic techniques. One of the two uterine horns, chosen at  
193 random, was exteriorized, and six 3-gm sterile stainless-steel beads (Bullet Weights, Alda, NE),  
194 each similar in size and weight to a late pregnant rat fetus, were attached to the anti-mesenteric  
195 border using silk sutures (Ethicon, Somerville, NJ). The number of stainless-steel beads was  
196 chosen because six fetuses is the median number of conceptuses in each uterine horn during  
197 spontaneous rat pregnancy.<sup>17</sup> The weight-loaded uterine horn was returned into the peritoneal  
198 cavity. The fascia was closed with 3-0 polyglactin 910 suture (coated VICRYL, Ethicon,  
199 Somerville, NJ) in a continuous running fashion, and the skin was closed with the same suture  
200 material in a continuous subcuticular fashion. Animals received an immediate post-operative  
201 subcutaneous intra-incisional injection of 0.25% bupivacaine at a dose of 0.4 mL/kg. Animals  
202 were euthanized either 4 hours post loading, to assess acute effect of mechanical load on PFMs,  
203 or 21 days later, to simulate the sustained load until late gestation.

204 In our initial perturbation of the model, we hoped to capitalize on the bi-horn rat uterine  
205 anatomy, with contralateral PFMs within one animal representing two sets of conditions: load<sup>-</sup>  
206 /pregnancy hormones<sup>-</sup> (side of non-loaded horn, control) and load<sup>+</sup>/pregnancy hormones<sup>-</sup> (side

207 with horn loaded with beads, non-pregnant loaded). Interestingly, the fiber length comparisons  
208 between contralateral PFM revealed that sustained load affected both sides, with no significant  
209 differences in fiber lengths identified between sides for either of the PFM pairs examined ( $P>0.5$ ,  
210 Supplemental Table 1). Thus, we selected rats with unilaterally weighed uterine horns to  
211 represent the load<sup>+</sup>/pregnancy hormones<sup>-</sup> condition, with a separate group of non-pregnant  
212 unperturbed rats used to represent load<sup>-</sup>/pregnancy hormones<sup>-</sup> condition. In addition, fiber length  
213 in non-pregnant rats with single loaded uterine horn for 21 days did not differ from that in late  
214 pregnant animals. This is likely because beads equal in weight and size to term fetal rats were  
215 attached for the entire duration. Nevertheless, to avoid the risk of exceeding adaptations  
216 observed in pregnancy, we proceeded with unilateral loading in the load<sup>+</sup>/pregnancy hormones<sup>-</sup>  
217 group.

218

### 219 ***Pregnant rat model of reduced loading of the pelvic floor muscles***

220 To create the physiological state of pregnancy with reduced mechanical load, 3-month-  
221 old nulligravid rats (N=9) were subjected to a unilateral horn ligation, right or left side selected  
222 at random. The selected uterine horn was exteriorized through the laparotomy incision, as  
223 described above, and two silk sutures (Ethicon, Somerville, NJ) were placed approximately 1.5  
224 cm apart and tied down. The intervening portion of the horn was excised (Figure 1), and the  
225 uterine horn was returned to the peritoneal cavity. The incisions were closed as described above.  
226 After 5 days of recovery, the rats were mated and examined daily. The day the vaginal plug was  
227 observed was designated as gestational day 1. The animals were euthanized on gestational day  
228 21 (late pregnant).

229

230

231 ***The effect of sustained mechanical load on the pelvic floor muscles' response to parturition-***  
232 ***associated strains***

233 To determine whether sustained exposure to increased load in the absence of pregnancy  
234 hormonal milieu impacts PFM response to parturition-associated strains, 3-month-old nulligravid  
235 rats (N=20) underwent the mechanical loading, as described above. Animals were housed for 21  
236 days. On day 21 after loading, the rats underwent an established vaginal balloon distension  
237 procedure.<sup>19</sup> Two volumes representing physiologic (3 ml, well-approximates fetal rat size) and  
238 supraphysiologic (5 ml, approximately 67% larger than fetal rat size) strains were tested  
239 (N=10/volume).<sup>19</sup> Animals were euthanized after 2 hours of vaginal distension.

240

241 ***Muscle Architectural Parameters***

242 The rat coccygeus and the two components of levator ani (pubocaudalis and  
243 iliocaudalis)<sup>21</sup>, as well as tibialis anterior that served as non-pelvic control muscle were fixed *in*  
244 *situ* in formaldehyde for 3-5 days after euthanasia to preserve *in vivo* muscle architecture.  
245 Muscle length ( $L_m$ ) was measured *in situ* using digital calipers, after which bilateral PFMs and  
246 tibialis anterior were harvested and microdissected for fiber length ( $L_f$ ) measurement and high-  
247 throughput  $L_s$  measurement by laser diffraction using validated methods.<sup>18,22</sup>

248

249 ***Intramuscular Extracellular Matrix Assessment***

250 Hydroxyproline, a major component of collagen, was measured to determine the  
251 intramuscular ECM content using a validated protocol.<sup>20,23</sup> Samples were procured from the mid-  
252 belly of PFMs and tibialis anterior (3 samples/each muscle), weighed, and hydrolyzed in 6 N

253 hydrochloric acid at 110°C for 24 hours. Experimental samples were placed into the 96-well  
254 plates in duplicate along with the standards and incubated with a chloramine-T solution,  
255 followed by the addition of a p-dimethylaminobenzaldehyde solution. We used  
256 spectrophotometry at 550 nm to determine hydroxyproline concentration, normalized to the wet  
257 weight of the sample, and converted to collagen using the constant of 7.46, the number of  
258 hydroxyproline residues per collagen molecule.

259

### 260 *Statistical Analysis*

261 Structural parameters of each individual PFM subjected to variable conditions, illustrated in  
262 Figure 1, and tibialis anterior were compared using 2-way repeated measures ANOVA (factors:  
263 load/hormonal status x muscle). Sample size was explored for the key variables of interest  
264 (normalized fiber length ( $L_{fn}$ )<sup>18</sup>, sarcomere length ( $L_s$ )). We set type I error  $\alpha = 0.05$ , power  $(1-\beta)$   
265 = 0.80. Based on Cohen's d effect size of 3.2, power calculation (G\*Power) yielded n=4  
266 animals/group.<sup>24</sup> We increased the sample size in the animals subjected to surgical procedure  
267 (load<sup>+</sup>/hormones<sup>-</sup> and reduced load/hormones<sup>+</sup>) to account for potential attrition due to post-  
268 operative complications. Given a large effect size for collagen content in our previous studies<sup>18</sup>,  
269 this sample size was sufficient for this outcome of interest. For  $L_s$  changes in response to vaginal  
270 distention, n=4-5 rats/group/volume was needed for coccygeus and pubocaudalis, given the large  
271 effect size, and n=10/group/volume was needed for iliocaudalis that experiences less strain<sup>19</sup>.  
272 Post-hoc pairwise comparisons, when appropriate, were conducted with tests adjusted for  
273 multiple comparisons. All data were checked for normality to satisfy the assumptions of the  
274 parametric tests. All analyses were performed with GraphPad Prism 9.1.1, CA, USA.

275

276 **RESULTS**

277 *The acute effect of increased mechanical load on the pelvic floor muscles' contractile*  
278 *myofibers*

279         The increase in mechanical load induced by uterine bead loading (Figure 2A) resulted in  
280 immediate PFM stretch, evidenced by significantly increased muscle length ( $L_m$ ) of each PFM  
281 on the loaded side compared to the contralateral non-loaded side and unperturbed PFMs in non-  
282 pregnant animals (Figure 2B and 2C). In the acute setting, an increase in sarcomere length ( $L_s$ )  
283 on the loaded side was similarly observed (Figure 2D). These results demonstrate that increased  
284 load imposed on PFMs by the weighted uterine horn leads to the acute whole muscle stretch and  
285 the paralleling sarcomere elongation, indicated by increased  $L_s$ . In appendicular muscles,  
286 increase in  $L_s$  serves as a strong impetus for sarcomerogenesis in the face of continued exposure  
287 to mechanical load.<sup>3</sup> Thus, we next proceeded to assess whether load-induced sarcomerogenesis  
288 takes place in PFMs in the non-pregnant model subjected to the sustained load, such as that  
289 observed in pregnancy.

290

291 *The effect of sustained mechanical load, uncoupled from the endocrine milieu of pregnancy,*  
292 *on the PFMs' structural parameters*

293         In skeletal muscles, fiber length ( $L_f$ ) can change secondary to either 1) sarcomere  
294 elongation/contraction or 2) adaptive assembly/disassembly of the sarcomeres. Thus, we first  
295 examined  $L_s$  of PFMs and tibialis anterior. There was no difference in  $L_s$  between any of the  
296 experimental conditions (load<sup>-</sup>/pregnancy hormones<sup>-</sup>, load<sup>+</sup>/pregnancy hormones<sup>-</sup>, reduced  
297 load/pregnancy hormones<sup>-</sup>, and load<sup>+</sup>/pregnancy hormones<sup>+</sup>) for all muscles examined (Table 1).  
298 These results mean that any fiber elongation would be the result of adaptive sarcomerogenesis

299 due to sustained load rather than persistent sarcomere stretch observed in the acute phase.

300 We then measured the length of the muscle fibers ( $L_f$ ). Even though  $L_s$  did not differ  
301 between the groups, we additionally controlled for any potential differences between specimens  
302 at the time of fixation. To this effect, we calculated normalized fiber length ( $L_{fn}$ ) that takes into  
303 account  $L_s$  within each specimen at the time of fixation, using previously established methods  
304 ( $L_{fn} = S_n \times L_{so}$ , where  $S_n$  is sarcomere number ( $S_n = L_f/L_s$ ) and  $L_{so}$  is species-specific optimal  $L_s$   
305 ( $2.4 \mu\text{m}$  in rat).<sup>18</sup> For the reduced load/pregnancy hormones<sup>+</sup> group, we compared PFM  $L_{fn}$   
306 between the sides with and without conceptuses. The differences between the contralateral sides  
307 were observed in coccygeus and pubocaudalis, with  $L_{fn}$  on the side ipsilateral to the uterine horn  
308 with conceptuses significantly exceeding that on the side with ligated uterine horn in coccygeus  
309 ( $P = 0.03$ ) and approaching statistical significance in pubocaudalis ( $P = 0.07$ , Figure 3). There  
310 were no differences between contralateral sides for iliocaudalis or tibialis anterior,  $P > 0.9$ . We,  
311 therefore, used the values from the side ipsilateral to the ligated uterine horn for comparisons  
312 across the experimental groups.

313 The following results are presented in comparison to the load/pregnancy hormones<sup>-</sup>  
314 control group, unless stated otherwise (Table 2). Coccygeus demonstrated addition of sarcomeres  
315 in series in response to muscle and sarcomere stretch induced by the increased load uncoupled  
316 from pregnancy hormones, as well as reduced load in the presence of pregnancy hormones. The  
317 above is evident from the increased  $L_{fn}$  in both the load<sup>+</sup>/pregnancy hormones<sup>-</sup> ( $P < 0.0001$ ) and  
318 reduced load/pregnancy hormones<sup>+</sup> groups ( $P = 0.01$ ). Moreover, coccygeus  $L_{fn}$  in these groups  
319 did not differ from that observed in the load<sup>+</sup>/pregnancy hormones<sup>+</sup> group ( $P > 0.5$ ). In contrast,  
320 pubocaudalis  $L_{fn}$  increased significantly in the load<sup>+</sup>/pregnancy hormones<sup>-</sup> ( $P < 0.05$ ), but not in  
321 the reduced load/pregnancy hormones<sup>+</sup> ( $P > 0.1$ ). For iliocaudalis, substantial sarcomerogenesis

322 occurred in response to non-reduced load and pregnancy hormones together, as evident by  
323 significant increase in  $L_{fn}$  only in the load<sup>+</sup>/pregnancy hormones<sup>+</sup> group ( $P<0.05$ ). In contrast to  
324 PFMs, tibialis anterior was not affected by either the increased load, pregnancy hormones, or the  
325 combination of these physiological cues ( $P>0.1$ ).

326 Next, we compared the ECM collagen content of PFMs and tibialis anterior subjected to  
327 the same experimental conditions. The intramuscular collagen content of coccygeus and  
328 pubocaudalis was significantly greater in the load<sup>+</sup>/pregnancy hormones<sup>-</sup> group and the reduced  
329 load/pregnancy hormones<sup>-</sup> group than in the load<sup>-</sup>/pregnancy hormones<sup>-</sup> group, ( $P < 0.05$ , Figure  
330 4). Moreover, the collagen content of coccygeus and pubocaudalis in these groups did not differ  
331 from that observed in the load<sup>+</sup>/pregnancy hormones<sup>+</sup> group ( $P>0.5$ ). These data indicate that  
332 load or pregnancy hormones can induce the ECM remodeling in these PFMs, with no additional  
333 increase in the intramuscular collagen observed in the presence of both cues. In the iliocaudalis  
334 and tibialis anterior, there were no differences in collagen content between any of the  
335 experimental groups ( $P>0.2$ ).

336

337 *The effect of sustained mechanical load, uncoupled from the endocrine milieu of pregnancy,*  
338 *on the PFMs' response to parturition-related strains.*

339 We have previously shown that pregnancy-induced adaptations protect PFMs against  
340 birth injury, as indicated by the absence of sarcomere hyperelongation, a major cause of  
341 mechanical muscle injury, in response to parturition-related strains.<sup>19</sup> To determine whether  
342 sarcomerogenesis of coccygeus and pubocaudalis induced by increased load was similarly  
343 protective against parturition-related strains, we compared the impact of vaginal distention of  
344 various magnitude between three experimental conditions (load<sup>-</sup>/pregnancy hormones<sup>-</sup>,



345 load<sup>+</sup>/pregnancy hormones<sup>-</sup>, and load<sup>+</sup>/pregnancy hormones<sup>+</sup>). The data from historic controls  
346 were used for the load<sup>-</sup>/pregnancy hormones<sup>-</sup> and load<sup>+</sup>/pregnancy hormones<sup>+</sup> conditions,<sup>19</sup> given  
347 confirmed reproducibility of our vaginal distention model.<sup>25</sup>

#### 348 *Response to physiologic parturition-related strains*

349 In response to vaginal distension with the 3mL balloon volume (physiologic strain,  
350 Figure 5A), L<sub>s</sub> of coccygeus and pubocaudalis in the load<sup>+</sup>/hormones<sup>-</sup> group were substantially  
351 shorter than L<sub>s</sub> in the load<sup>-</sup>/hormones<sup>-</sup> group ( $P < 0.01$ ). However, sarcomere elongation was still  
352 significantly longer than that in the load<sup>+</sup>/hormones<sup>+</sup> group ( $P < 0.001$ ). Taken together, these data  
353 indicate that adaptations induced by increased load in the absence of hormonally driven  
354 alterations confer an intermediate protective effect against mechanical muscle injury caused by  
355 parturition-associated strains. As expected, there were no differences in iliocaudalis L<sub>s</sub> between  
356 the groups ( $P > 0.2$ ), as this PFM experiences smaller strains during vaginal balloon distention.<sup>19</sup>

#### 357 *Response to suprphysiologic parturition-related strains*

358  
359  
360 Next, we determined whether mechanical load provided protection against  
361 suprphysiologic strains (Figure 5B). Like the response to vaginal distention with 3mL volume,  
362 coccygeus L<sub>s</sub> in the load<sup>+</sup>/hormones<sup>-</sup> group was significantly shorter than the load<sup>-</sup>/pregnancy  
363 hormones<sup>-</sup> group. However, as opposed to the smaller strain, L<sub>s</sub> in the load<sup>+</sup>/hormones<sup>-</sup> group did  
364 not differ from L<sub>s</sub> in the load<sup>+</sup>/hormones<sup>+</sup> group ( $P > 0.5$ ). With respect to pubocaudalis, L<sub>s</sub> in  
365 load<sup>+</sup>/hormones<sup>-</sup> group did not differ from that in either load<sup>-</sup>/pregnancy hormones<sup>-</sup> ( $P > 0.1$ ) or  
366 the load<sup>+</sup>/hormones<sup>+</sup> ( $P > 0.2$ ) group. This confirms that our model reproduced adaptations that  
367 are protective against physiological strains, and that the protective effect of these adaptations  
368 diminishes when mechanical insult associated with parturition is excessive. Iliocaudalis L<sub>s</sub> also  
369 did not differ between the groups ( $P > 0.1$ ).

370

371 **COMMENT**

372 *Principal Findings*

373           The plasticity of the individual components of the rat PFM complex in response to  
374 mechanical and endocrine cues is variable. Out of all PFMs, coccygeus is the most susceptible to  
375 either stimuli, with sarcomerogenesis observed in all experimental conditions tested  
376 (load<sup>+</sup>/pregnancy hormones<sup>-</sup>, reduced load/pregnancy hormones<sup>+</sup>, load<sup>+</sup>/pregnancy hormones<sup>+</sup>)  
377 compared to the unperturbed controls (load<sup>-</sup>/pregnancy hormones<sup>-</sup>). In pubocaudalis, fiber length  
378 increased in response to load alone and in combination with pregnancy hormones. Fiber length  
379 of iliocaudalis increased only in response to the combinatorial effect of mechanical and  
380 hormonal cues. These results indicate that coccygeus responds to either mechanical or endocrine  
381 stimulus. With respect to pubocaudalis, loading is sufficient to induce sarcomerogenesis and  
382 mechanical cue is likely the dominant driver of this adaptation in this portion of the rat levator  
383 ani muscle. The key role of mechanical load in the plasticity of the contractile component of  
384 these muscles is further supported by our findings in the unilaterally pregnant (reduced  
385 load/hormones<sup>+</sup>) group.  $L_{fm}$  on the side ipsilateral to the uterine horn with conceptuses was  
386 significantly greater than on the side with ligated uterine horn in coccygeus and pubocaudalis,  
387 where this difference approached statistical significance. Importantly, the extent of PFM  
388 elongation by sarcomerogenesis in coccygeus and pubocaudalis in the load<sup>+</sup>/hormones<sup>-</sup> group  
389 was equivalent to that observed in the unperturbed pregnant (load<sup>+</sup>/hormones<sup>+</sup>) rats. On the other  
390 hand, neither load alone nor hormonal stimulation with reduced load are sufficient to induce  
391 sarcomerogenesis of iliocaudalis, which required both mechanical and endocrine cues. In contrast  
392 to PFMs and consistent with our previous findings,<sup>18</sup> the hind limb tibialis anterior muscle was

393 not affected by either the increased mechanical load imposed by the weighted uterine horns,  
394 pregnancy hormones, or the combination of these physiological cues, suggesting that PFMs are  
395 uniquely and differentially susceptible to these perturbations.

396 Like the response of the contractile myofibers, intramuscular ECM remodeling induced  
397 by mechanical load in the presence or absence of pregnant hormonal milieu varied across  
398 individual PFMs. Intramuscular collagen content of coccygeus and pubocaudalis increased in  
399 response to either load or hormonal stimuli. As with PFM elongation by sarcomerogenesis, the  
400 increase in ECM collagen content of coccygeus and pubocaudalis in the load<sup>+</sup>/hormones<sup>-</sup> group  
401 was equivalent to that observed in the pregnant rats (load<sup>+</sup>/hormones<sup>+</sup>). We did not observe an  
402 increase in collagen content in iliocaudalis or tibialis anterior in any of the experimental  
403 conditions compared to the load<sup>-</sup>/hormones<sup>-</sup> controls. These results indicate that, as with  
404 sarcomerogenesis, ECM remodeling of coccygeus and pubocaudalis is induced by either  
405 mechanical or endocrine stimulus.

406 The importance of pregnancy-induced adaptations in the pelvic soft tissues mainly lies in  
407 their protective function against maternal birth injury. To this effect, we examined the response  
408 of chronically loaded PFMs to parturition-associated strains of various magnitudes. We found  
409 that adaptations of coccygeus and pubocaudalis, resultant from increased load, conferred  
410 protective effect against mechanical muscle injury relative to the response of the control muscles  
411 (load<sup>-</sup>/hormones<sup>-</sup>). However, this protective effect was smaller than that afforded by the  
412 adaptative changes of PFMs exposed to load and pregnant hormonal milieu. With respect to the  
413 supraphysiological strains, adaptations of coccygeus induced by load alone are sufficient to  
414 protect against mechanical muscle injury, based on our finding that sarcomere length in the  
415 load<sup>+</sup>/hormones<sup>-</sup> group was significantly less than the hyperelongated sarcomeres in the

416 unperturbed load<sup>-</sup>/hormones<sup>-</sup> group and not different from the load<sup>+</sup>/hormones<sup>+</sup> group. Load-  
417 induced adaptations of pubocaudalis were inadequate to confer protection against sarcomere  
418 hyperelongation, when this muscle experienced a higher magnitude strains.

#### 419 ***Results in the Context of What is Known***

420 Taken together, our results support the hypothesis that initial sarcomere elongation  
421 promotes sarcomerogenesis of PFMs, ultimately leading to return of sarcomeres to their  
422 operational length, which is necessary for optimal *in vivo* muscle function. Prior investigations  
423 in various animal models have demonstrated a similar phenomenon in limb muscles – that  
424 muscles placed under chronic stretch elongate via sarcomerogenesis.<sup>26,27</sup> Overall, increased  
425 mechanical load appears to play a key role in driving pregnancy-induced adaptations in the rat  
426 PFMs. In our study, load-induced sarcomerogenesis and increase in the intramuscular collagen  
427 content in the non-pregnant model varied by muscle, with coccygeus most responsive  
428 (alterations with either load or pregnancy hormones), iliocaudalis least responsive (alterations  
429 with neither load nor pregnancy hormones alone), and pubocaudalis demonstrating  
430 responsiveness intermediate to coccygeus and iliocaudalis. Importantly, PFM plasticity in  
431 response to increased load afforded protection against PFM mechanical birth injury, with degree  
432 of protection varying between PFMs and strain magnitude. Taken together, this points towards a  
433 differential sensitivity of the individual pelvic skeletal muscles to the physiological cues  
434 associated with pregnancy. In addition, our findings suggest that the combinatorial effect of the  
435 endocrine and mechanical signals plays an important role in the PFM response to parturition-  
436 related strains.

437

#### 438 ***Clinical Implications***

439           Our findings suggest that modulation of the PFM stretch induced by mechanical load  
440 during pregnancy, such as with specific pelvic floor training regimens, may be a potential  
441 therapeutic intervention for augmenting the protective antepartum PFM plasticity and preventing  
442 muscle injury during vaginal delivery.

443

#### 444 ***Research Implications***

445           In the current study we begin to elucidate the multifactorial mechanisms that govern PFM  
446 plasticity during pregnancy. Determining the key drivers of the protective adaptations of PFMs  
447 in the pre-clinical model is essential for promoting our understanding of the potential PFM  
448 plasticity in pregnant women and its role in modulating one's predisposition to birth injury. To  
449 date, the causes underlying differential pelvic soft tissue damage during parturition and  
450 subsequent development of pelvic floor disorders in vaginally parous women remains unknown,  
451 and no effective strategies exist for the prevention of maternal birth injury.

452

#### 453 ***Strengths and Limitations***

454           The strengths of the current work include the use of the rat model, specifically validated  
455 for the studies of the human PFMs<sup>13,14</sup>; the development of the novel non-pregnant rat model of  
456 PFM mechanical loading; and the first evaluation of the role of mechanical load and related  
457 muscle stretch, in the presence and absence of the endocrine cues of pregnancy, in PFM  
458 plasticity.

459           The limitations of our study are inherent to the use of experimental models to simulate  
460 human condition. However, direct PFM tissue studies are not possible in asymptomatic living  
461 women, thus precise tissue-level experiments in the animal model are the necessary step in the

462 continuum of these clinically relevant studies. Also, given a reduction in placentally-derived  
463 factors in rats with a smaller number of gestations, the hormonal milieu in the reduced  
464 load/pregnancy hormones<sup>+</sup> may be different compared to animals with a larger number of  
465 conceptuses. Unfortunately, currently there is no known way to induce the complete spectrum of  
466 endocrine changes that occur in pregnancy without the pregnancy itself, which constitutes a load  
467 on PFMs. Also, we were unable to steadily increase the mechanical load over time as occurs in a  
468 normal gestation; instead, PFMs were exposed to the same load for the entire 21 days. Therefore,  
469 the effects of mechanical load in pregnancy could be overestimated. However, the extent of  
470 sarcomerogenesis and increase in PFM ECM collagen content were comparable in our non-  
471 pregnant loaded model and pregnant animals. Finally, since we based our *a priori* sample size  
472 calculation on differences between the non-pregnant (load<sup>-</sup>/hormones<sup>-</sup>) and pregnant  
473 (load<sup>+</sup>/hormones<sup>+</sup>) controls, we performed *post hoc* power analysis and found that we only had  
474 48% power to detect a difference in PCa  $L_{fn}$  between reduced load/hormones<sup>+</sup> and non-pregnant  
475 controls.

476

## 477 **Conclusions**

478 Load induces plasticity of the intrinsic pelvic floor muscle components that renders  
479 protection against mechanical birth injury. The protective effect, which varies between  
480 individual muscles and strain magnitudes, is further augmented by the presence of pregnancy  
481 hormones. Maximizing impact of mechanical load on pelvic floor muscles during pregnancy,  
482 such as with specialized pelvic floor muscle stretching regimens, is a potentially actionable target  
483 for augmenting pregnancy-induced adaptations to decrease birth injury in women who may  
484 otherwise have incomplete antepartum muscle adaptations.

485

486 **ACKNOWLEDGEMENTS**

487 We gratefully acknowledge our funding source – NIH grant R01 HD092515 from Eunice  
488 Kennedy Shriver National Institute of Child Health and Human Development- that supported this  
489 project.

490

491 **References**

492

- 493 1. Dietz HP. Pelvic organ prolapse - a review. *Aust Fam Physician*. 2015;44(7):446-452.
- 494 2. Minassian VA, Bazi T, Stewart WF. Clinical epidemiological insights into urinary  
495 incontinence. *Int Urogynecol J*. 2017;28(5):687-696.
- 496 3. Hoyte L, Damaser MS, Warfield SK, et al. Quantity and distribution of levator ani stretch  
497 during simulated vaginal childbirth. *American journal of obstetrics and gynecology*.  
498 2008;199(2):198 e191-195.
- 499 4. Lien KC, Mooney B, DeLancey JO, Ashton-Miller JA. Levator ani muscle stretch  
500 induced by simulated vaginal birth. *Obstetrics and gynecology*. 2004;103(1):31-40.
- 501 5. Brooks SV, Zerba E, Faulkner JA. Injury to muscle fibres after single stretches of passive  
502 and maximally stimulated muscles in mice. *The Journal of physiology*. 1995;488 ( Pt  
503 2):459-469.
- 504 6. Hallock JL, Handa VL. The Epidemiology of Pelvic Floor Disorders and Childbirth: An  
505 Update. *Obstet Gynecol Clin North Am*. 2016;43(1):1-13.
- 506 7. Lieber RL, Friden J. Functional and clinical significance of skeletal muscle architecture.  
507 *Muscle Nerve*. 2000;23(11):1647-1666.
- 508 8. Morgan DL. New insights into the behavior of muscle during active lengthening. *Biophys*  
509 *J*. 1990;57(2):209-221.
- 510 9. Peviani SM, Guzzoni V, Pinheiro-Dardis CM, et al. Regulation of extracellular matrix  
511 elements and sarcomerogenesis in response to different periods of passive stretching in  
512 the soleus muscle of rats. *Sci Rep*. 2018;8(1):9010.



- 513 10. De Deyne PG, Hayatsu K, Meyer R, Paley D, Herzenberg JE. Muscle regeneration and  
514 fiber-type transformation during distraction osteogenesis. *J Orthop Res.* 1999;17(4):560-  
515 570.
- 516 11. Kjaer M. Role of extracellular matrix in adaptation of tendon and skeletal muscle to  
517 mechanical loading. *Physiol Rev.* 2004;84(2):649-698.
- 518 12. Yasuda T, Kondo S, Homma T, Harris RC. Regulation of extracellular matrix by  
519 mechanical stress in rat glomerular mesangial cells. *J Clin Invest.* 1996;98(9):1991-2000.
- 520 13. Alperin M, Tuttle LJ, Conner BR, et al. Comparison of pelvic muscle architecture  
521 between humans and commonly used laboratory species. *Int Urogynecol J.*  
522 2014;25(11):1507-1515.
- 523 14. Stewart AM, Cook MS, Esparza MC, Slayden OD, Alperin M. Architectural assessment  
524 of rhesus macaque pelvic floor muscles: comparison for use as a human model.  
525 *International urogynecology journal.* 2017;28(10):1527-1535.
- 526 15. Alperin M, Feola A, Duerr R, Moalli P, Abramowitch S. Pregnancy- and delivery-  
527 induced biomechanical changes in rat vagina persist postpartum. *Int Urogynecol J.*  
528 2010;21(9):1169-1174.
- 529 16. Lowder JL, Debes KM, Moon DK, Howden N, Abramowitch SD, Moalli PA.  
530 Biomechanical adaptations of the rat vagina and supportive tissues in pregnancy to  
531 accommodate delivery. *Obstetrics and gynecology.* 2007;109(1):136-143.
- 532 17. Daucher JA, Clark KA, Stolz DB, Meyn LA, Moalli PA. Adaptations of the rat vagina in  
533 pregnancy to accommodate delivery. *Obstetrics and gynecology.* 2007;109(1):128-135.

- 534 18. Alperin M, Lawley DM, Esparza MC, Lieber RL. Pregnancy-induced adaptations in the  
535 intrinsic structure of rat pelvic floor muscles. *Am J Obstet Gynecol.* 2015;213(2):191  
536 e191-197.
- 537 19. Catanzarite T, Bremner S, Barlow CL, Bou-Malham L, O'Connor S, Alperin M. Pelvic  
538 muscles' mechanical response to strains in the absence and presence of pregnancy-  
539 induced adaptations in a rat model. *Am J Obstet Gynecol.* 2018;218(5):512 e511-512  
540 e519.
- 541 20. Alperin M, Kaddis T, Pichika R, Esparza MC, Lieber RL. Pregnancy-induced adaptations  
542 in intramuscular extracellular matrix of rat pelvic floor muscles. *Am J Obstet Gynecol.*  
543 2016;215(2):210 e211-217.
- 544 21. Bremer RE, Barber MD, Coates KW, Dolber PC, Thor KB. Innervation of the levator ani  
545 and coccygeus muscles of the female rat. *The anatomical record Part A, Discoveries in*  
546 *molecular, cellular, and evolutionary biology.* 2003;275(1):1031-1041.
- 547 22. Lieber RL, Yeh Y, Baskin RJ. Sarcomere length determination using laser diffraction.  
548 Effect of beam and fiber diameter. *Biophys J.* 1984;45(5):1007-1016.
- 549 23. Edwards CA, O'Brien WD, Jr. Modified assay for determination of hydroxyproline in a  
550 tissue hydrolyzate. *Clin Chim Acta.* 1980;104(2):161-167.
- 551 24. Faul F, Erdfelder E, Lang AG, Buchner A. G\*Power 3: a flexible statistical power  
552 analysis program for the social, behavioral, and biomedical sciences. *Behav Res Methods.*  
553 2007;39(2):175-191.
- 554 25. Duran P, Sesillo FB, Burnett L, et al. Pro-regenerative Extracellular Matrix Hydrogel  
555 Prevents and Mitigates Pathological Alterations of Pelvic Muscles Following Birth  
556 Injury. *bioRxiv.* 2021:2021.2005.2028.446170.

- 557 26. Lieber RL, Roberts TJ, Blemker SS, Lee SSM, Herzog W. Skeletal muscle mechanics,  
558 energetics and plasticity. *J Neuroeng Rehabil.* 2017;14(1):108.
- 559 27. Tabary JC, Tabary C, Tardieu C, Tardieu G, Goldspink G. Physiological and structural  
560 changes in the cat's soleus muscle due to immobilization at different lengths by plaster  
561 casts. *J Physiol.* 1972;224(1):231-244.
- 562
- 563
- 564

565 **Table 1. Sarcomere length (in micrometers) of the pelvic floor muscles and tibialis anterior**  
 566 **in the presence of load and/or pregnancy hormones presented as mean  $\pm$  standard error of**  
 567 **mean**

| Muscle            | Load <sup>-</sup> /<br>Hormones <sup>-</sup><br>(N=10)                                             | Load <sup>+</sup> /<br>Hormones <sup>-</sup><br>(N=9)                                              | Reduced Load/<br>Hormones <sup>-</sup><br>(N=9)                                                 | Load <sup>+</sup> /<br>Hormones <sup>+</sup><br>(N=5)                                              |                                                                                                 |                                                                                                 |
|-------------------|----------------------------------------------------------------------------------------------------|----------------------------------------------------------------------------------------------------|-------------------------------------------------------------------------------------------------|----------------------------------------------------------------------------------------------------|-------------------------------------------------------------------------------------------------|-------------------------------------------------------------------------------------------------|
| Coccygeus         | 2.38 $\pm$ 0.05                                                                                    | 2.36 $\pm$ 0.05                                                                                    | 2.38 $\pm$ 0.03                                                                                 | 2.26 $\pm$ 0.04                                                                                    |                                                                                                 |                                                                                                 |
| Pubocaudalis      | 2.36 $\pm$ 0.03                                                                                    | 2.32 $\pm$ 0.05                                                                                    | 2.39 $\pm$ 0.04                                                                                 | 2.27 $\pm$ 0.03                                                                                    |                                                                                                 |                                                                                                 |
| Iliocaudalis      | 2.46 $\pm$ 0.03                                                                                    | 2.36 $\pm$ 0.04                                                                                    | 2.46 $\pm$ 0.03                                                                                 | 2.40 $\pm$ 0.05                                                                                    |                                                                                                 |                                                                                                 |
| Tibialis Anterior | 2.60 $\pm$ 0.02                                                                                    | 2.60 $\pm$ 0.02                                                                                    | 2.64 $\pm$ 0.02                                                                                 | 2.54 $\pm$ 0.01                                                                                    |                                                                                                 |                                                                                                 |
|                   | <i>P</i> -value*                                                                                   |                                                                                                    |                                                                                                 |                                                                                                    |                                                                                                 |                                                                                                 |
| Muscle            | Load <sup>-</sup> /<br>Hormones <sup>-</sup><br>vs<br>Load <sup>+</sup> /<br>Hormones <sup>+</sup> | Load <sup>-</sup> /<br>Hormones <sup>-</sup><br>vs<br>Load <sup>+</sup> /<br>Hormones <sup>-</sup> | Load <sup>-</sup> /<br>Hormones <sup>-</sup><br>vs<br>Reduced<br>Load/<br>Hormones <sup>+</sup> | Load <sup>+</sup> /<br>Hormones <sup>+</sup><br>vs<br>Load <sup>+</sup> /<br>Hormones <sup>-</sup> | Load <sup>+</sup> /<br>Hormones <sup>+</sup><br>vs<br>Reduced<br>Load/<br>Hormones <sup>+</sup> | Load <sup>-</sup> /<br>Hormones <sup>-</sup><br>vs<br>Reduced<br>Load/<br>Hormones <sup>+</sup> |
| Coccygeus         | 0.06                                                                                               | 0.98                                                                                               | 0.99                                                                                            | 0.17                                                                                               | 0.09                                                                                            | 0.99                                                                                            |
| Pubocaudalis      | 0.21                                                                                               | 0.72                                                                                               | 0.95                                                                                            | 0.82                                                                                               | 0.07                                                                                            | 0.42                                                                                            |
| Iliocaudalis      | 0.66                                                                                               | 0.19                                                                                               | 0.99                                                                                            | 0.81                                                                                               | 0.63                                                                                            | 0.18                                                                                            |
| Tibialis Anterior | 0.66                                                                                               | 0.99                                                                                               | 0.87                                                                                            | 0.63                                                                                               | 0.24                                                                                            | 0.90                                                                                            |

568 \**P*-values were derived from two-way analysis of variance followed by Tukey's multiple  
 569 comparisons test, with the significance levels set to 5%.

570

571 **Table 2. Normalized fiber length ( $L_{fn}$ , millimeters) of the pelvic floor muscles and tibialis**  
 572 **anterior in the presence of load and/or pregnancy hormones presented as mean  $\pm$  standard**  
 573 **error of mean**

| Muscle                            | Load/<br>Hormones <sup>-</sup><br>(N=10)                                             | Load <sup>+</sup> /<br>Hormones <sup>-</sup><br>(N=9)                                | <i>P</i> -<br>value *                                                             | Reduced<br>Load/<br>Hormones <sup>-</sup><br>(N=9)                                                 | <i>P</i> -<br>value *                                                                           | Load <sup>+</sup> /<br>Hormones <sup>+</sup><br>(N=5)                             | <i>P</i> -<br>value * |
|-----------------------------------|--------------------------------------------------------------------------------------|--------------------------------------------------------------------------------------|-----------------------------------------------------------------------------------|----------------------------------------------------------------------------------------------------|-------------------------------------------------------------------------------------------------|-----------------------------------------------------------------------------------|-----------------------|
| Coccygeus                         | 9.97 $\pm$ 0.26                                                                      | 13.33 $\pm$ 0.94                                                                     | <0.0001                                                                           | 12.06 $\pm$ 0.44                                                                                   | 0.0075                                                                                          | 12.82 $\pm$ 0.30                                                                  | 0.0018                |
| Pubocaudalis                      | 19.52 $\pm$ 0.34                                                                     | 21.20 $\pm$ 0.52                                                                     | 0.0406                                                                            | 20.80 $\pm$ 0.59                                                                                   | 0.1567                                                                                          | 22.53 $\pm$ 0.33                                                                  | 0.0009                |
| Iliocaudalis                      | 19.45 $\pm$ 0.42                                                                     | 21.00 $\pm$ 0.46                                                                     | 0.0646                                                                            | 20.74 $\pm$ 0.49                                                                                   | 0.1540                                                                                          | 21.45 $\pm$ 0.83                                                                  | 0.0407                |
| Tibialis<br>Anterior              | 20.07 $\pm$ 0.39                                                                     | 20.58 $\pm$ 0.44                                                                     | 0.8076                                                                            | 21.44 $\pm$ 0.51                                                                                   | 0.1202                                                                                          | 21.21 $\pm$ 0.39                                                                  | 0.3770                |
| <b><i>P</i>-value<sup>†</sup></b> |                                                                                      |                                                                                      |                                                                                   |                                                                                                    |                                                                                                 |                                                                                   |                       |
| Muscle                            | Load/<br>Hormones <sup>-</sup><br>vs<br>Load <sup>+</sup> /<br>Hormones <sup>+</sup> | Load/<br>Hormones <sup>-</sup><br>vs<br>Load <sup>+</sup> /<br>Hormones <sup>-</sup> | Load/<br>Hormones <sup>-</sup><br>vs<br>Reduced<br>Load/<br>Hormones <sup>+</sup> | Load <sup>+</sup> /<br>Hormones <sup>+</sup><br>vs<br>Load <sup>+</sup> /<br>Hormones <sup>-</sup> | Load <sup>+</sup> /<br>Hormones <sup>+</sup><br>vs<br>Reduced<br>Load/<br>Hormones <sup>+</sup> | Load/<br>Hormones <sup>-</sup><br>vs<br>Reduced<br>Load/<br>Hormones <sup>+</sup> |                       |
| Coccygeus                         | 0.003                                                                                | <0.0001                                                                              | 0.01                                                                              | 0.93                                                                                               | 0.79                                                                                            | 0.27                                                                              |                       |
| Pubocaudalis                      | 0.002                                                                                | 0.07                                                                                 | 0.24                                                                              | 0.38                                                                                               | 0.16                                                                                            | 0.94                                                                              |                       |
| Iliocaudalis                      | 0.07                                                                                 | 0.11                                                                                 | 0.24                                                                              | 0.95                                                                                               | 0.82                                                                                            | 0.98                                                                              |                       |
| Tibialis<br>Anterior              | 0.50                                                                                 | 0.88                                                                                 | 0.19                                                                              | 0.87                                                                                               | 0.99                                                                                            | 0.61                                                                              |                       |

574 \**P*-values were derived from two-way analysis of variance followed by Dunnett's multiple  
 575 comparisons test, with the significance levels set to 5%.

576 †*P*-values were derived from two-way analysis of variance followed by Tukey's multiple  
 577 comparisons test, with the significance levels set to 5%.

578 **Supplemental Table 1. Normalized fiber length ( $L_{fn}$ , millimeters) of the pelvic floor muscles**  
579 **and tibialis anterior on loaded and non-loaded side in the Load<sup>+</sup>/Hormones<sup>-</sup> group**  
580 **presented as mean  $\pm$  standard error of mean**

| Muscle            | Non-loaded side (N=9) | Loaded side (N=9) | <i>P</i> -value* |
|-------------------|-----------------------|-------------------|------------------|
| Coccygeus         | 12.88 $\pm$ 0.54      | 13.33 $\pm$ 0.94  | 0.9763           |
| Pubocaudalis      | 21.57 $\pm$ 0.62      | 21.19 $\pm$ 0.52  | 0.8743           |
| Iliocaudalis      | 20.22 $\pm$ 0.75      | 21.00 $\pm$ 0.46  | 0.8478           |
| Tibialis Anterior | 21.79 $\pm$ 0.41      | 20.58 $\pm$ 0.44  | 0.5197           |

581 \**P*-values were derived from two-way analysis of variance followed by Šídák's multiple  
582 comparisons test, with the significance levels set to 5%.

583

584

585

586

587

588

589

590

591

592

593

594

## 595 **Figure Legends**

### 596 **Figure 1:**

597 **A schematic diagram of experimental approach.** To determine the independent and combined  
598 roles of mechanical load and hormonal milieu of pregnancy in driving pregnancy-induced  
599 adaptations in the rat pelvic floor muscles (PFMs), structural muscle parameters were compared  
600 between PFMs subjected to four sets of conditions: 1) load<sup>-</sup>/pregnancy hormones<sup>-</sup>; 2)  
601 load<sup>+</sup>/pregnancy hormones<sup>-</sup>; 3) reduced load/pregnancy hormones<sup>-</sup>; and 4) load<sup>+</sup>/pregnancy  
602 hormones<sup>+</sup>.

603

### 604 **Figure 2:**

605 **Acute impact of increased mechanical load on the pelvic floor muscles' (PFMs) contractile**  
606 **myofibers.** (A) Left uterine horn in non-pregnant rat, loaded with 3-gram stainless steel beads  
607 (arrows), each similar in size and weight to a late pregnant rat fetus, visible through a laparotomy  
608 incision. (B) Bilateral coccygeus muscles, with significantly increased muscle length ( $L_m$ ) of the  
609 left muscle (loaded side), relative to the right muscle. (C) Acute changes in the muscle lengths  
610 (in millimeters) of the PFMs subjected to increased load, relative to non-loaded contralateral  
611 PFMs and unperturbed controls. N=4/group. (D) Acute changes in the sarcomere lengths (in  
612 micrometers) of the PFMs subjected to increased load, relative to non-loaded contralateral PFMs  
613 and unperturbed controls. N=4/group.

614 *Footnote:* Data are presented as mean  $\pm$  standard error of mean. \* $P < 0.05$ ; \*\* $P < 0.01$ ; \*\*\* $P <$   
615  $0.001$ ; \*\*\*\* $P < 0.0001$  derived from repeated measures two-way analysis of variance followed  
616 by pairwise comparisons with Tukey's test.

617

618

619 **Figure 3**

620 **Comparison of pelvic floor muscle normalized fiber lengths (in millimeters) between side**  
621 **with conceptuses and side without conceptuses (ligated uterine horn) in reduced**  
622 **load/hormones<sup>+</sup> group.**

623 *Footnote: C, coccygeus; PCA, pubocaudalis; ICa, iliocaudalis; TA, tibialis anterior. Data are*  
624 *presented as mean ± standard error of mean. Some standard errors of mean values were too*  
625 *small*

626 *to be visible as error bars. \* $P < 0.05$  derived from paired Student's t-test.*

627

628 **Figure 4**

629 Changes in intramuscular collagen content (in micrograms per milligram of muscle tissue) in  
630 response to the independent and combinatorial effect of mechanical load and pregnancy hormone  
631 milieu as determined by measurement of intramuscular hydroxyproline content

632 *Footnote: Data are presented as mean ± standard error of mean. P-values were derived from*  
633 *repeated measures two-way analysis of variance followed by pairwise comparisons with*  
634 *Dunnett's and Tukey's tests. \* $P < 0.05$ ; \*\* $P < 0.01$ ; \*\*\* $P < 0.001$ ; \*\*\*\* $P < 0.0001$*

635

636 **Figure 5**

637 (A) Sarcomere length measurements (in micrometers) of rat pelvic floor muscles at 3 mL  
638 (physiologic) strain via vaginal distension in load<sup>-</sup>/hormones<sup>-</sup>, load<sup>+</sup>/hormones<sup>-</sup>,  
639 load<sup>+</sup>/hormones<sup>+</sup> groups



640 (B) Sarcomere length measurements (in micrometers) of rat pelvic floor muscles at 5 mL  
641 (supraphysiologic) strain via vaginal distension in load<sup>-</sup>/hormones<sup>-</sup>, load<sup>+</sup>/hormones<sup>-</sup>,  
642 load<sup>+</sup>/hormones<sup>+</sup> groups

643 Footnote: Data are presented as mean  $\pm$  standard error of mean. *P*-values were derived from  
644 repeated measures two-way analysis of variance followed by pairwise comparisons with Tukey's  
645 test. \**P* < 0.05; \*\**P* < 0.01; \*\*\**P* < 0.001; \*\*\*\**P* < 0.0001

646

### Condition 1

### Condition 2

### Condition 3

### Condition 4

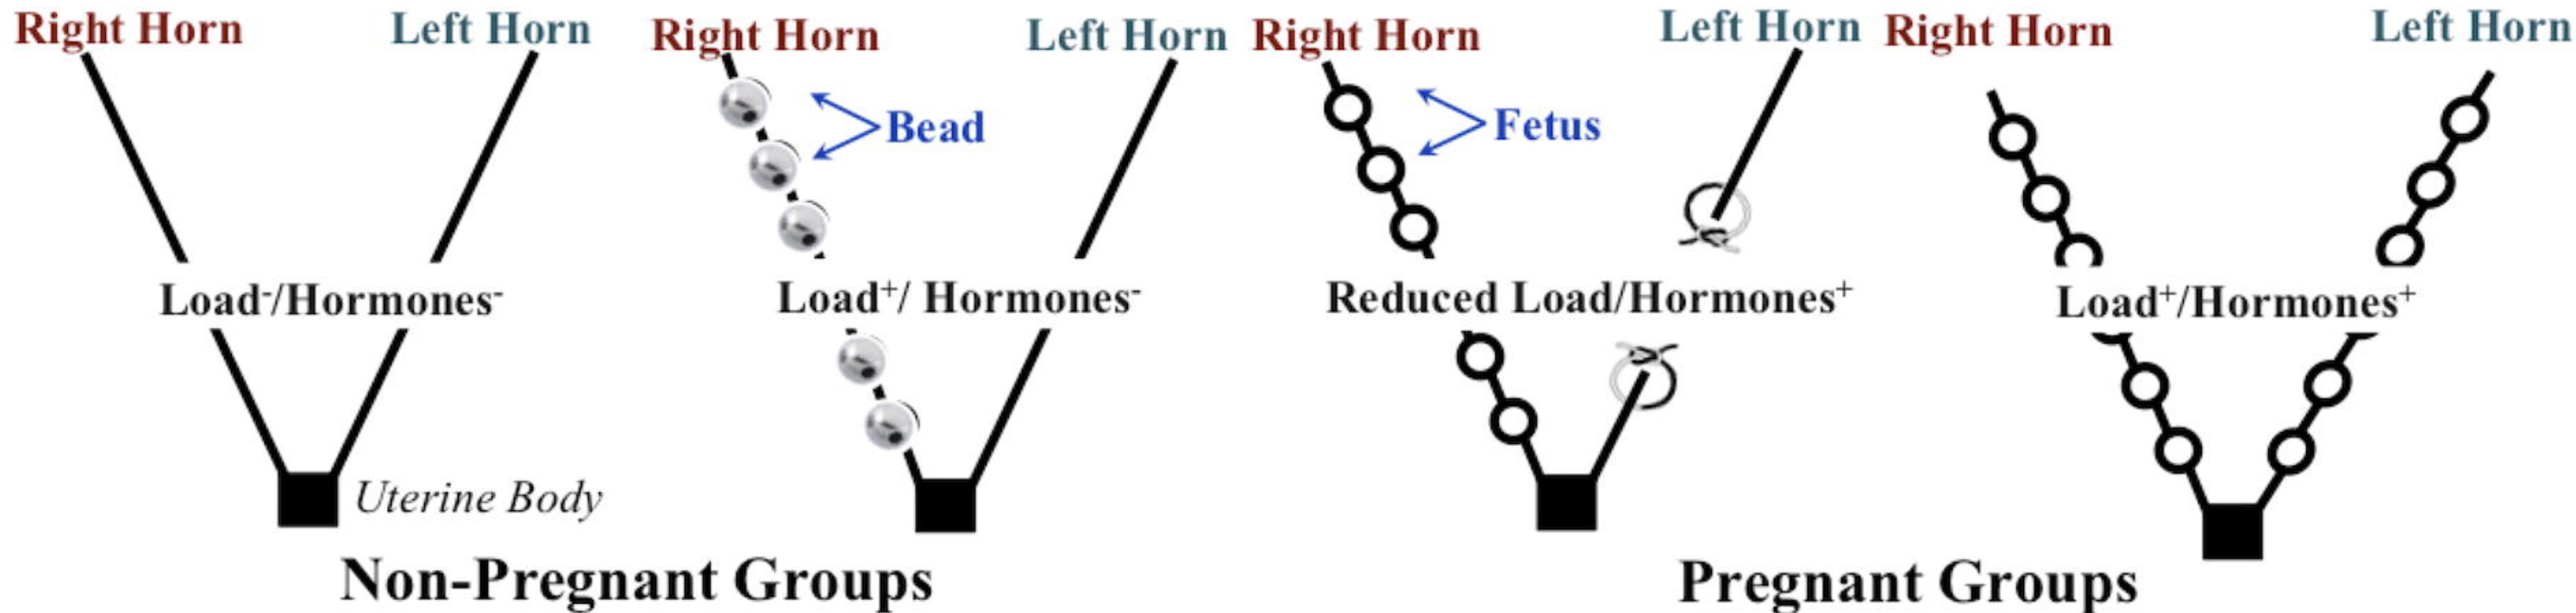

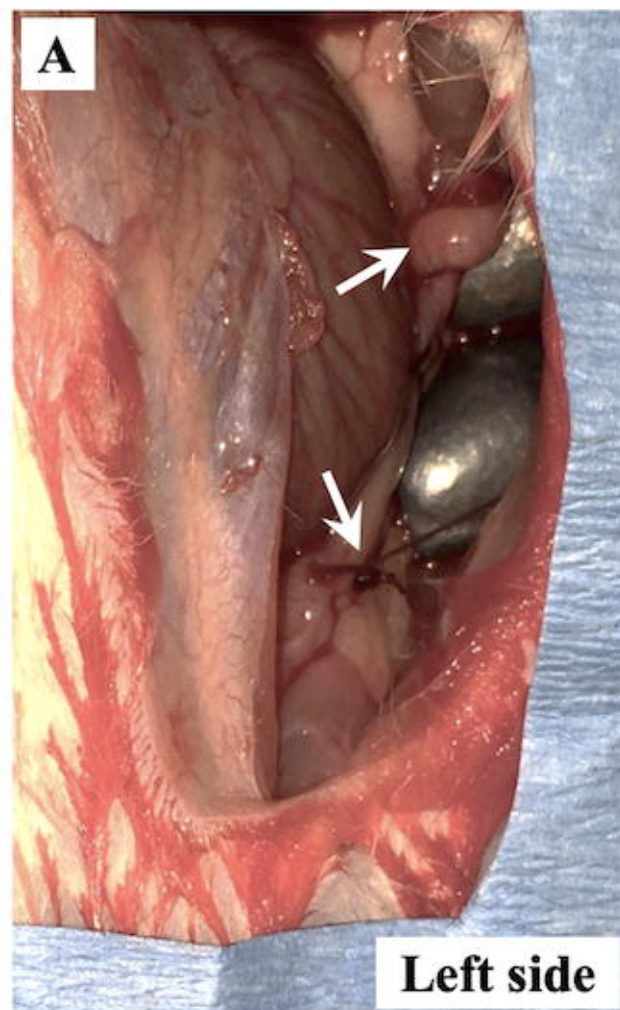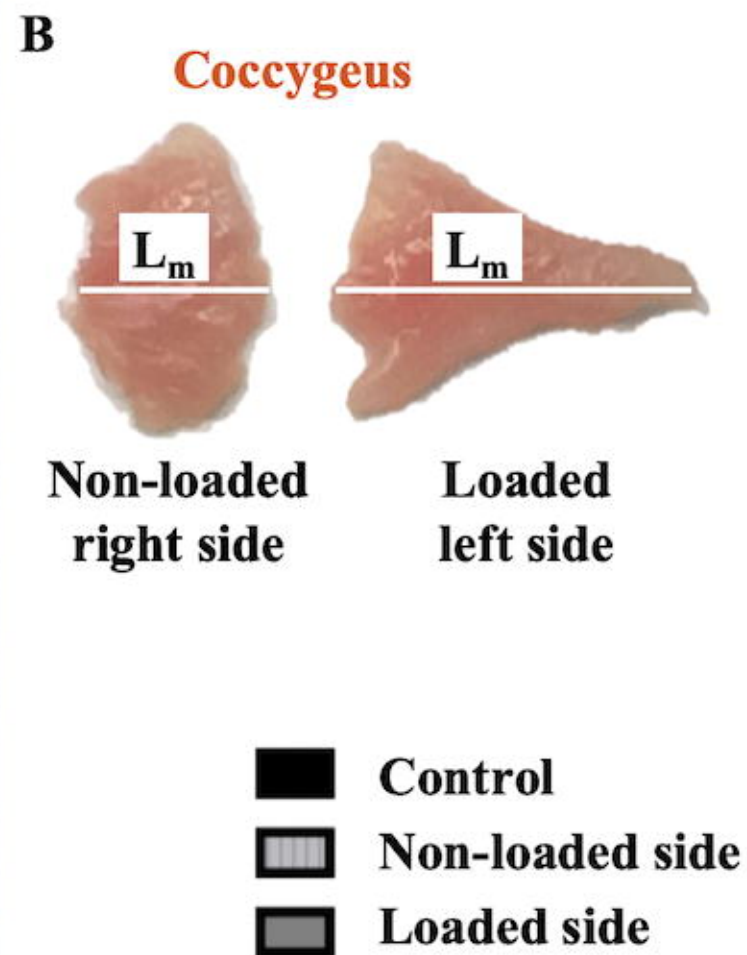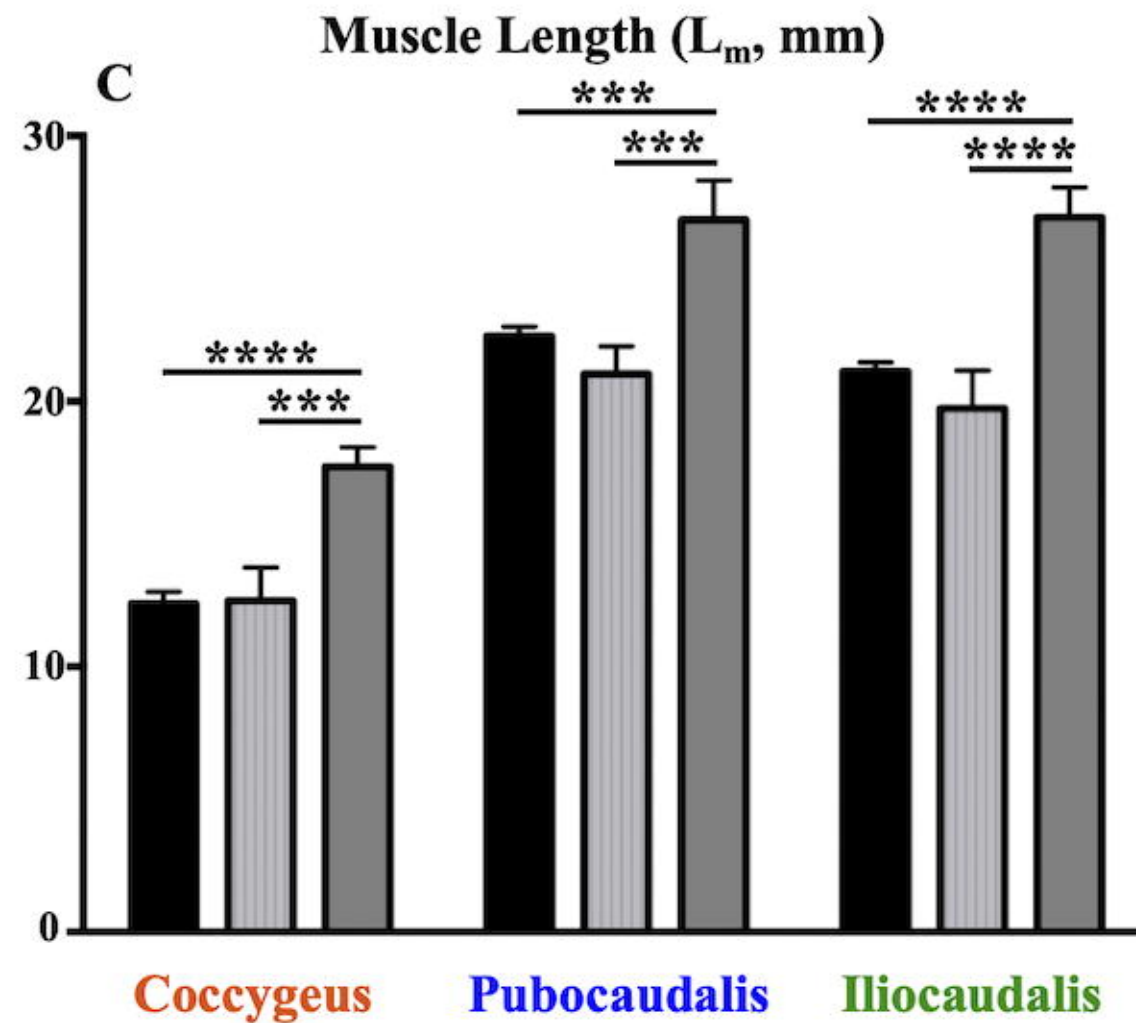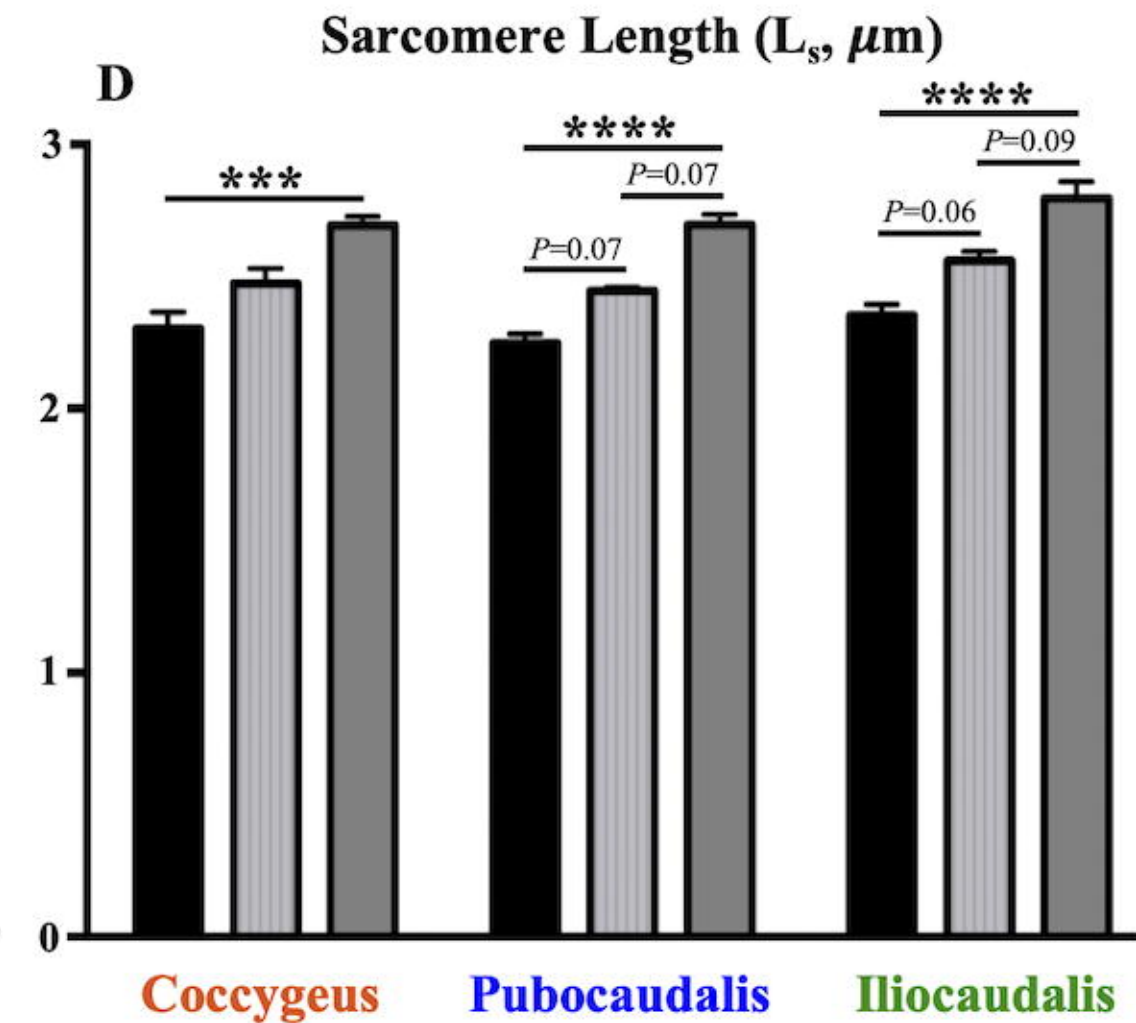

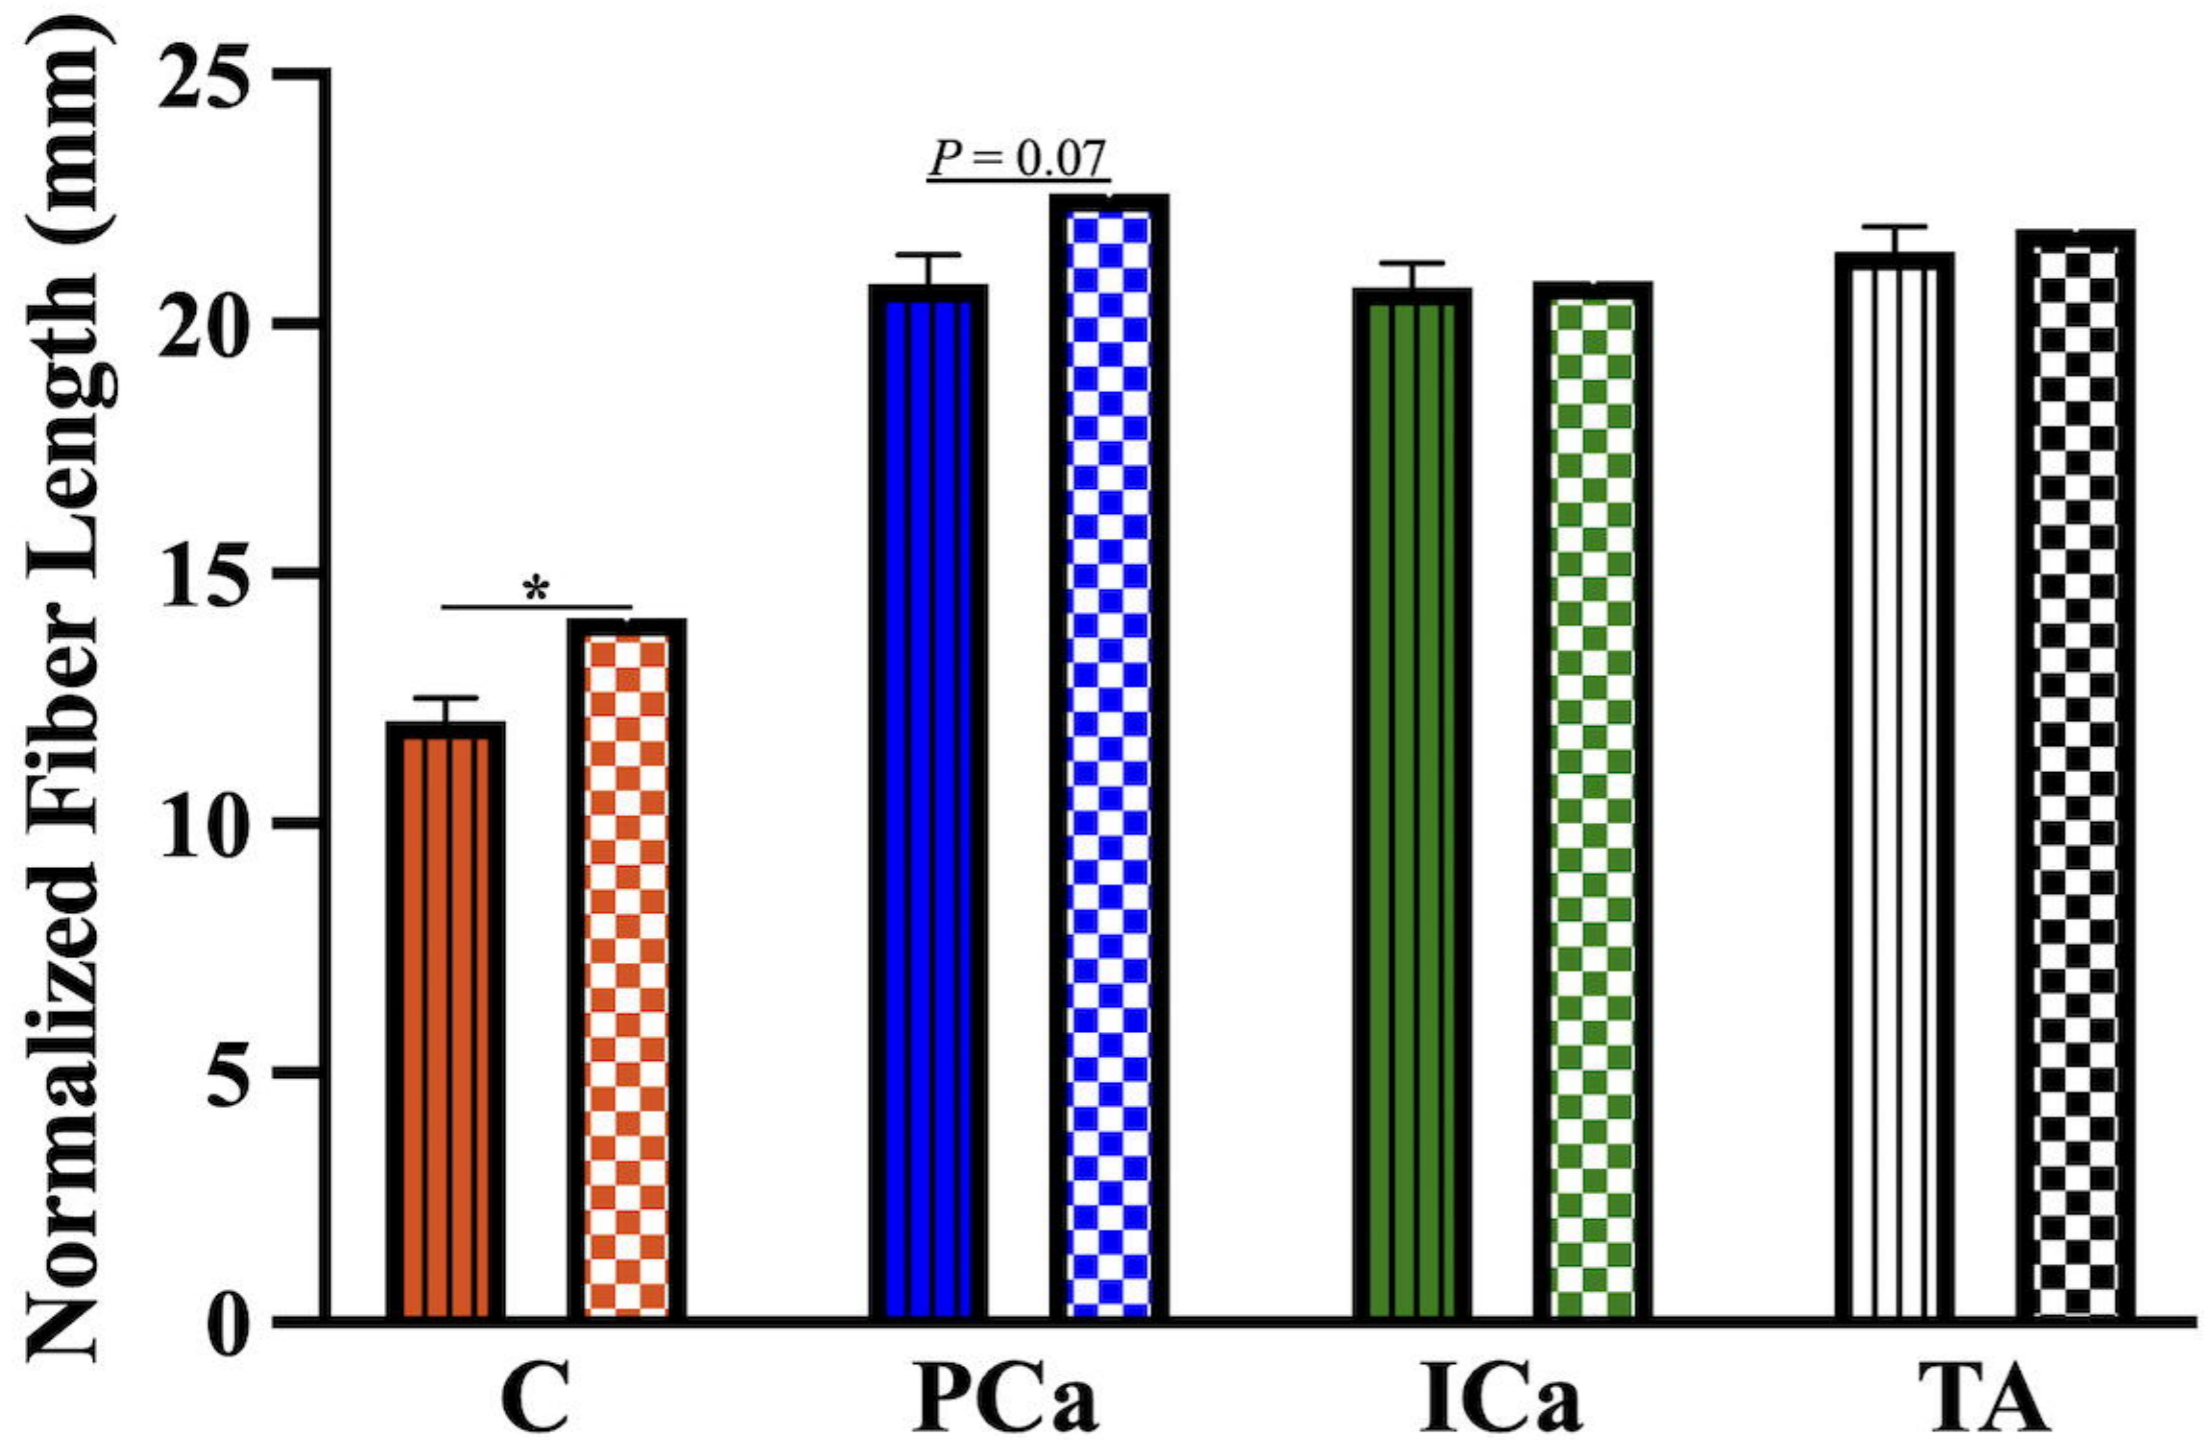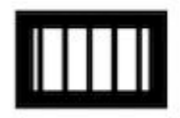

**ligated side**

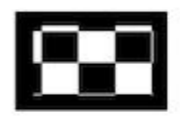

**side with conceptuses**

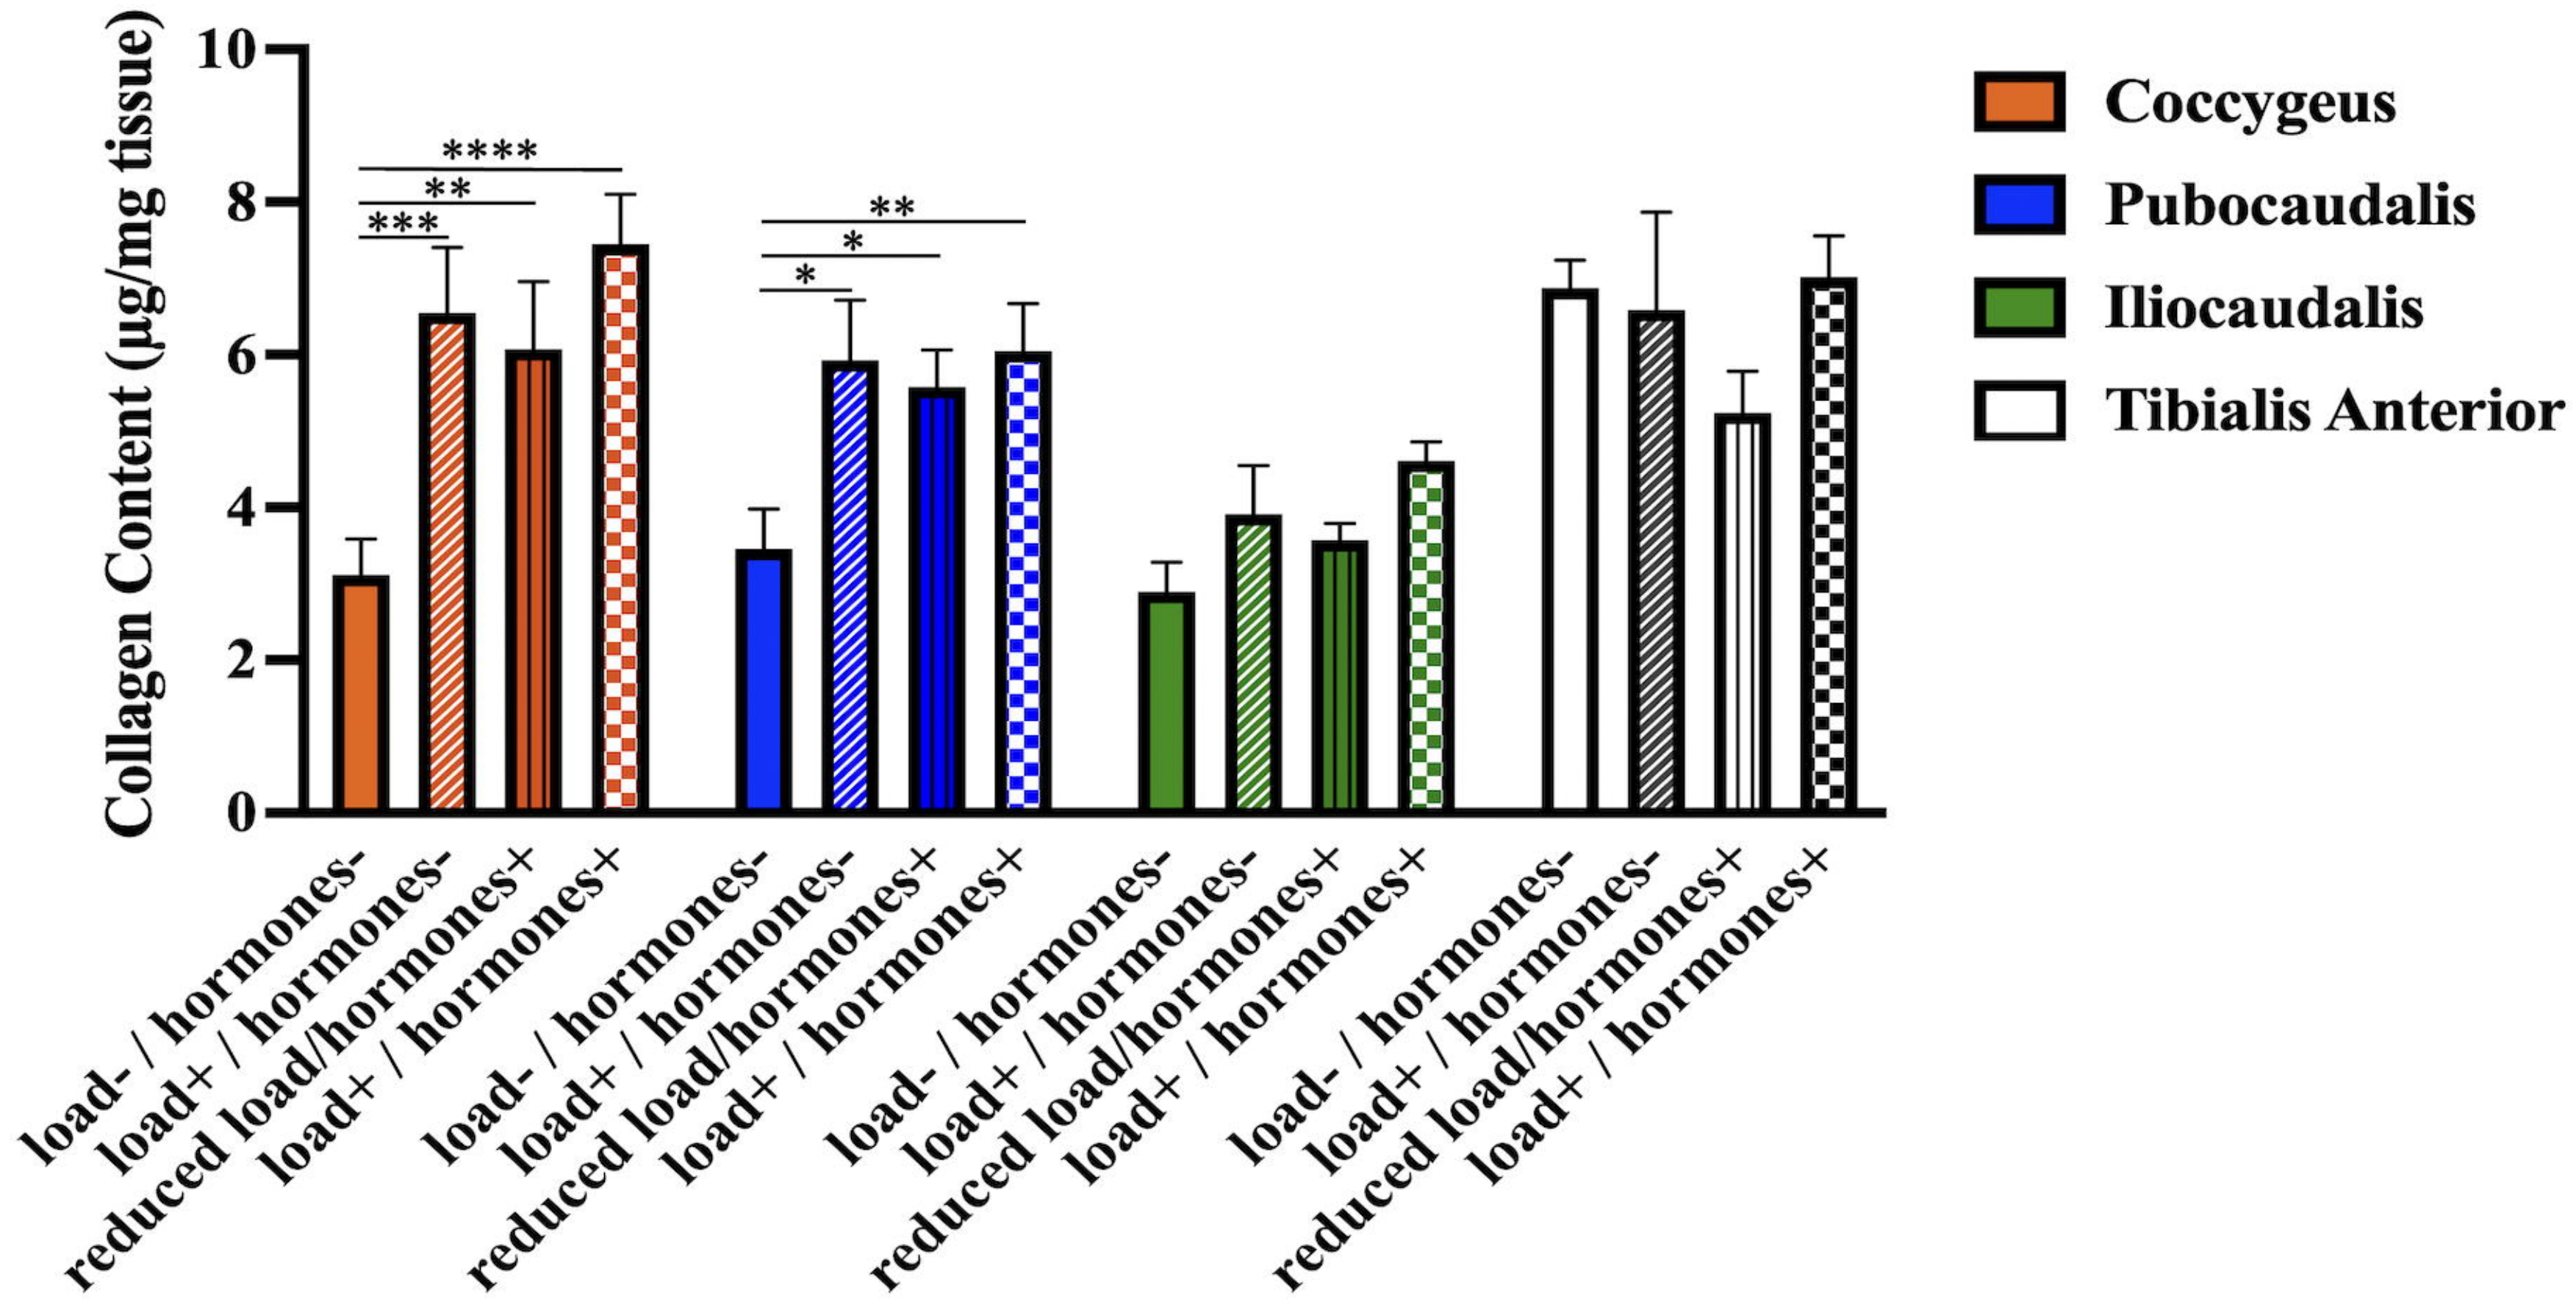

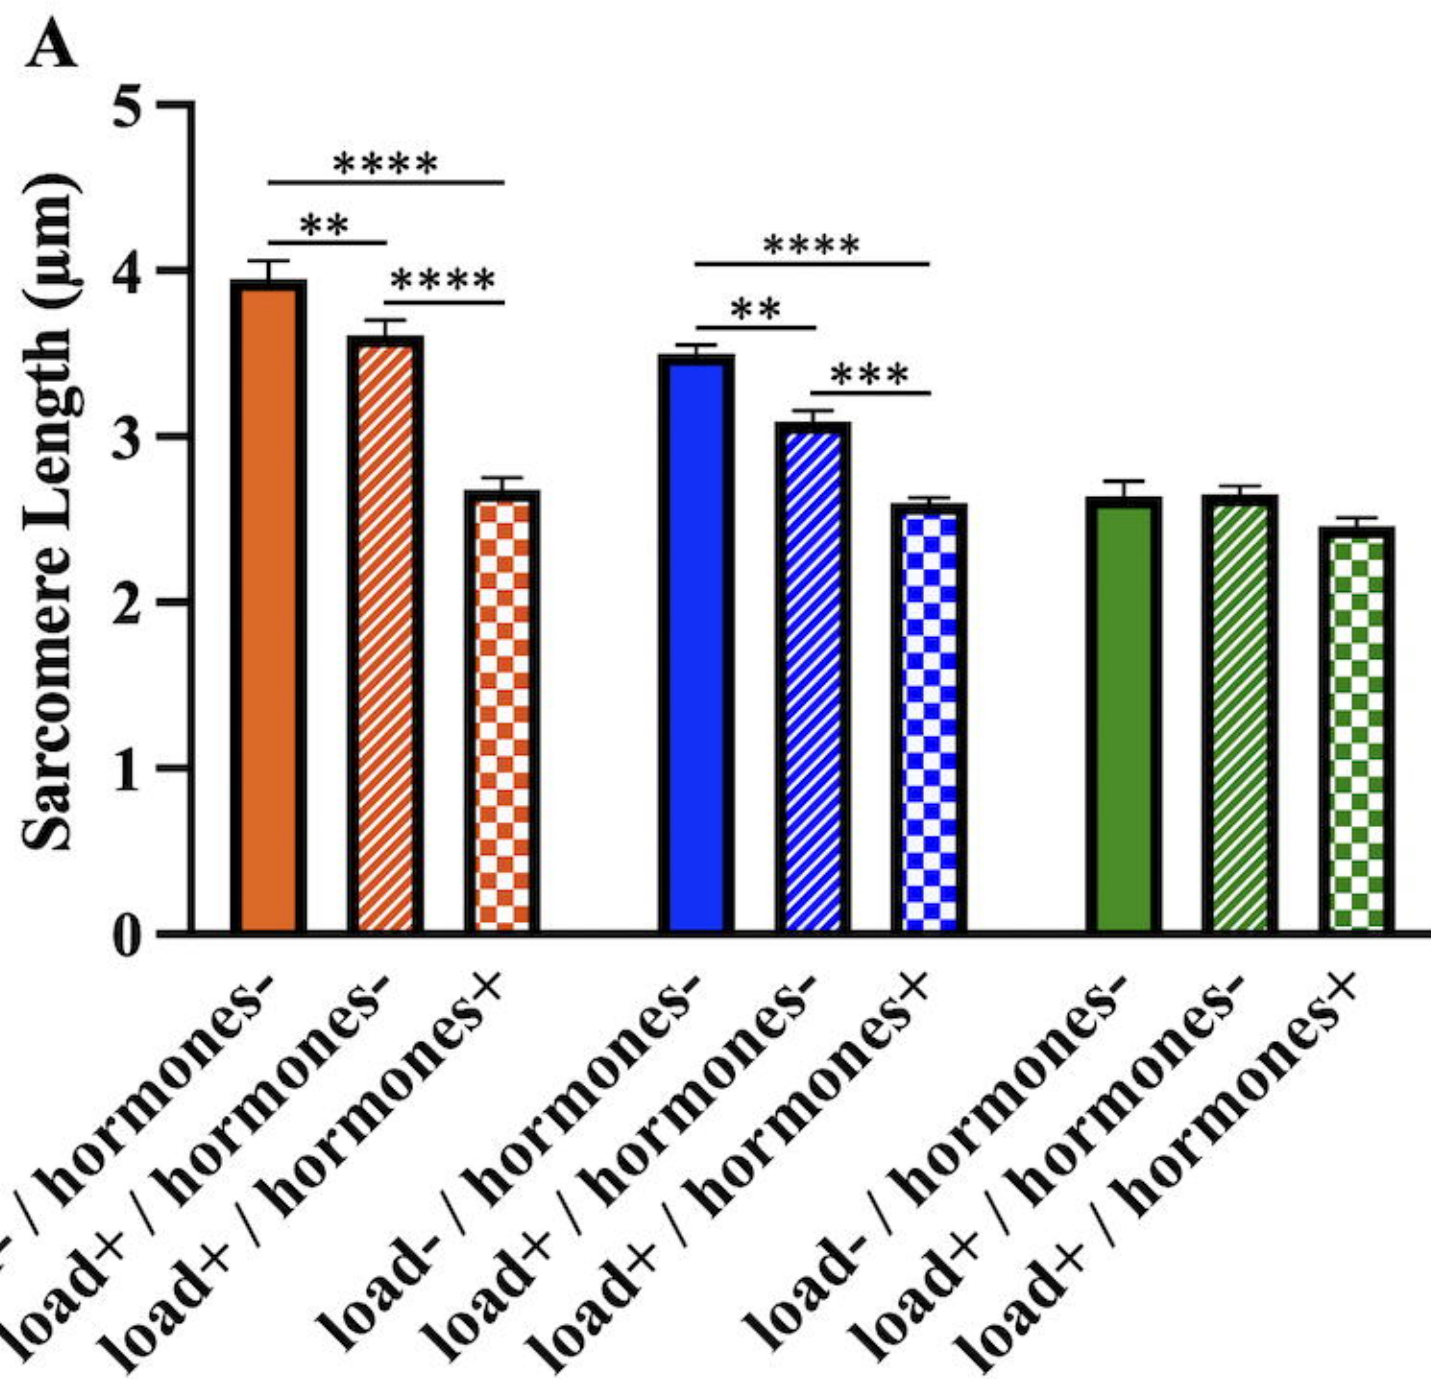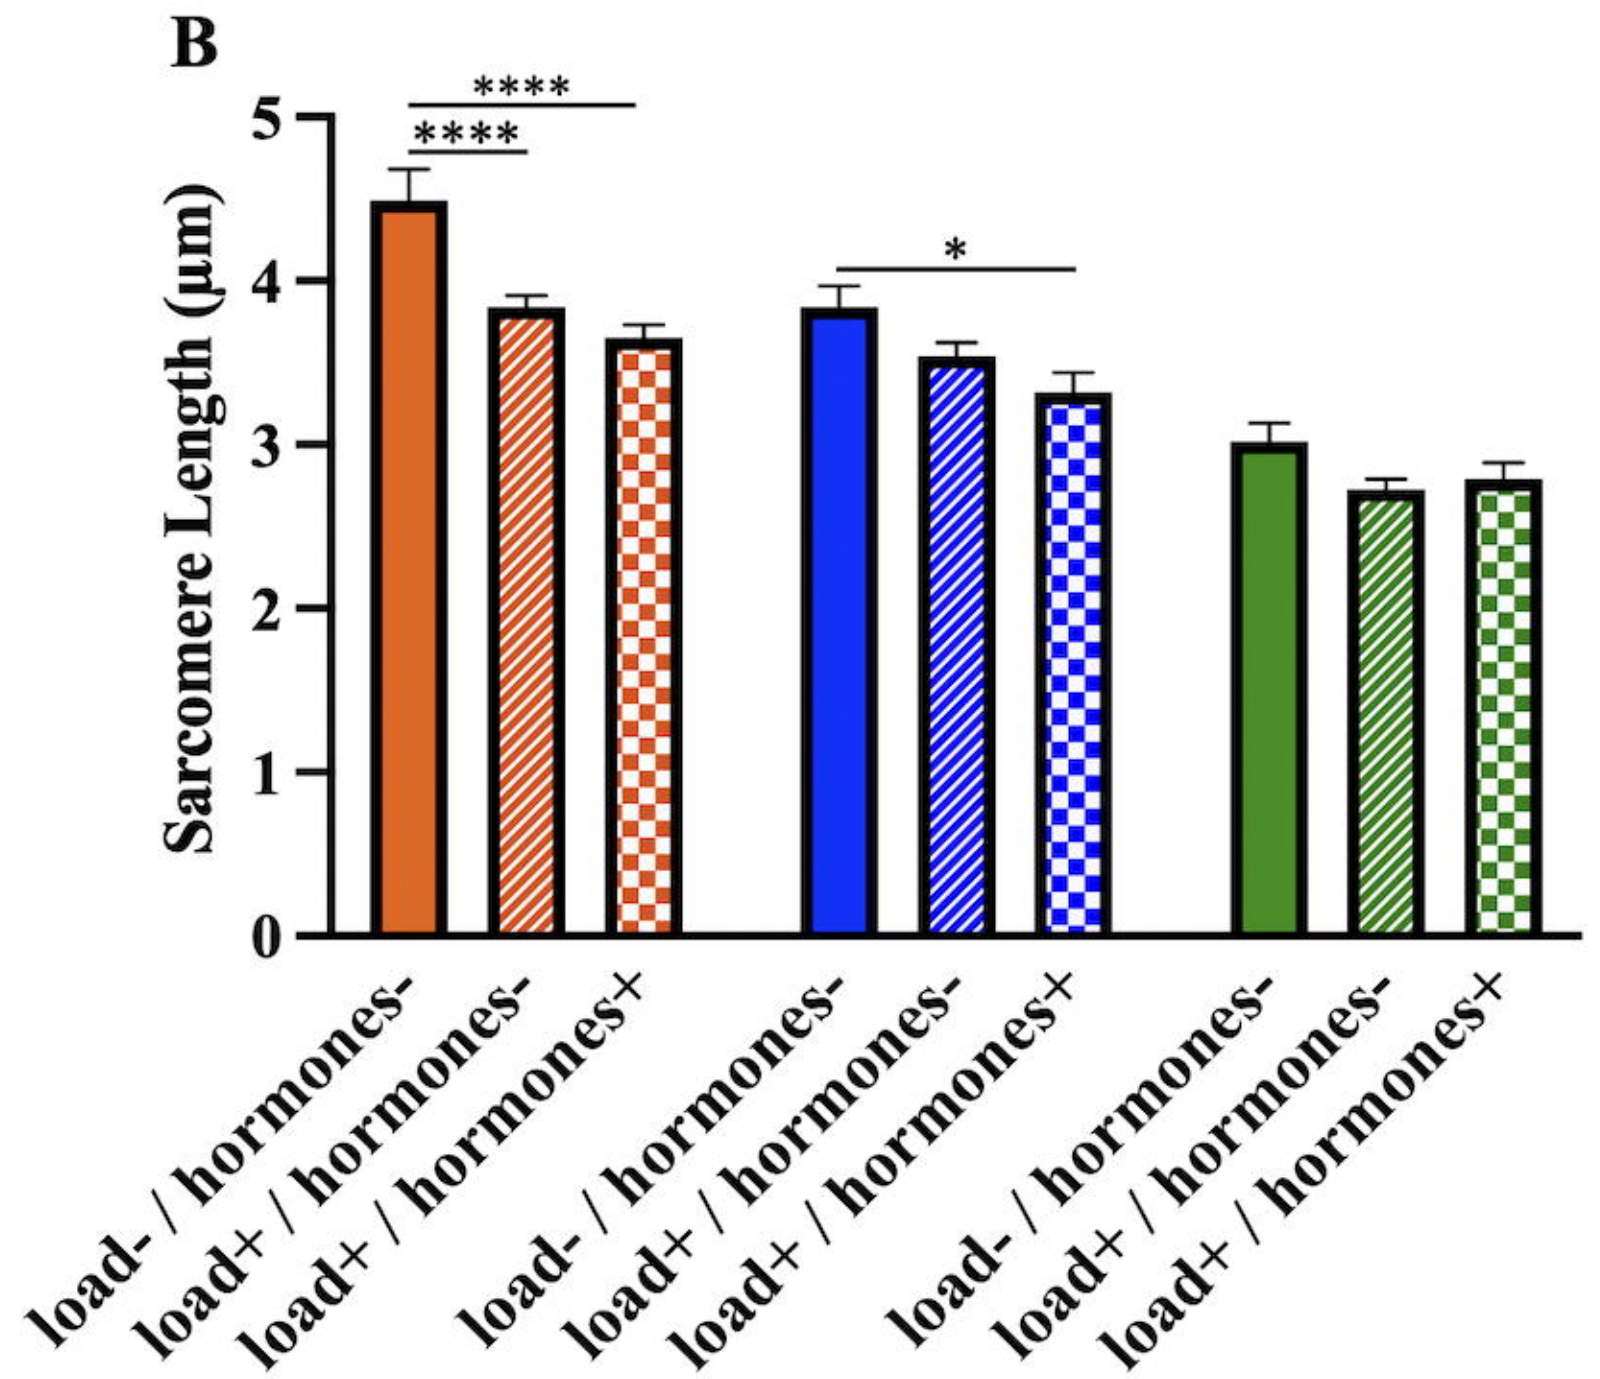

■ Coccygeus  
■ Pubocaudalis  
■ Iliocaudalis
